# Supplementary figures and images for: Rapid cell type-specific nascent proteome labeling in Drosophila
Source: eLife journal article supplement (doi:10.7554/elife.83545), 2023-04-10

OPP

-

+

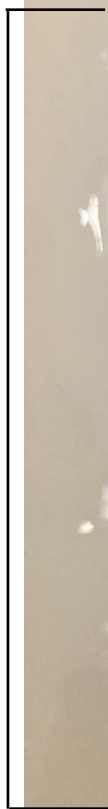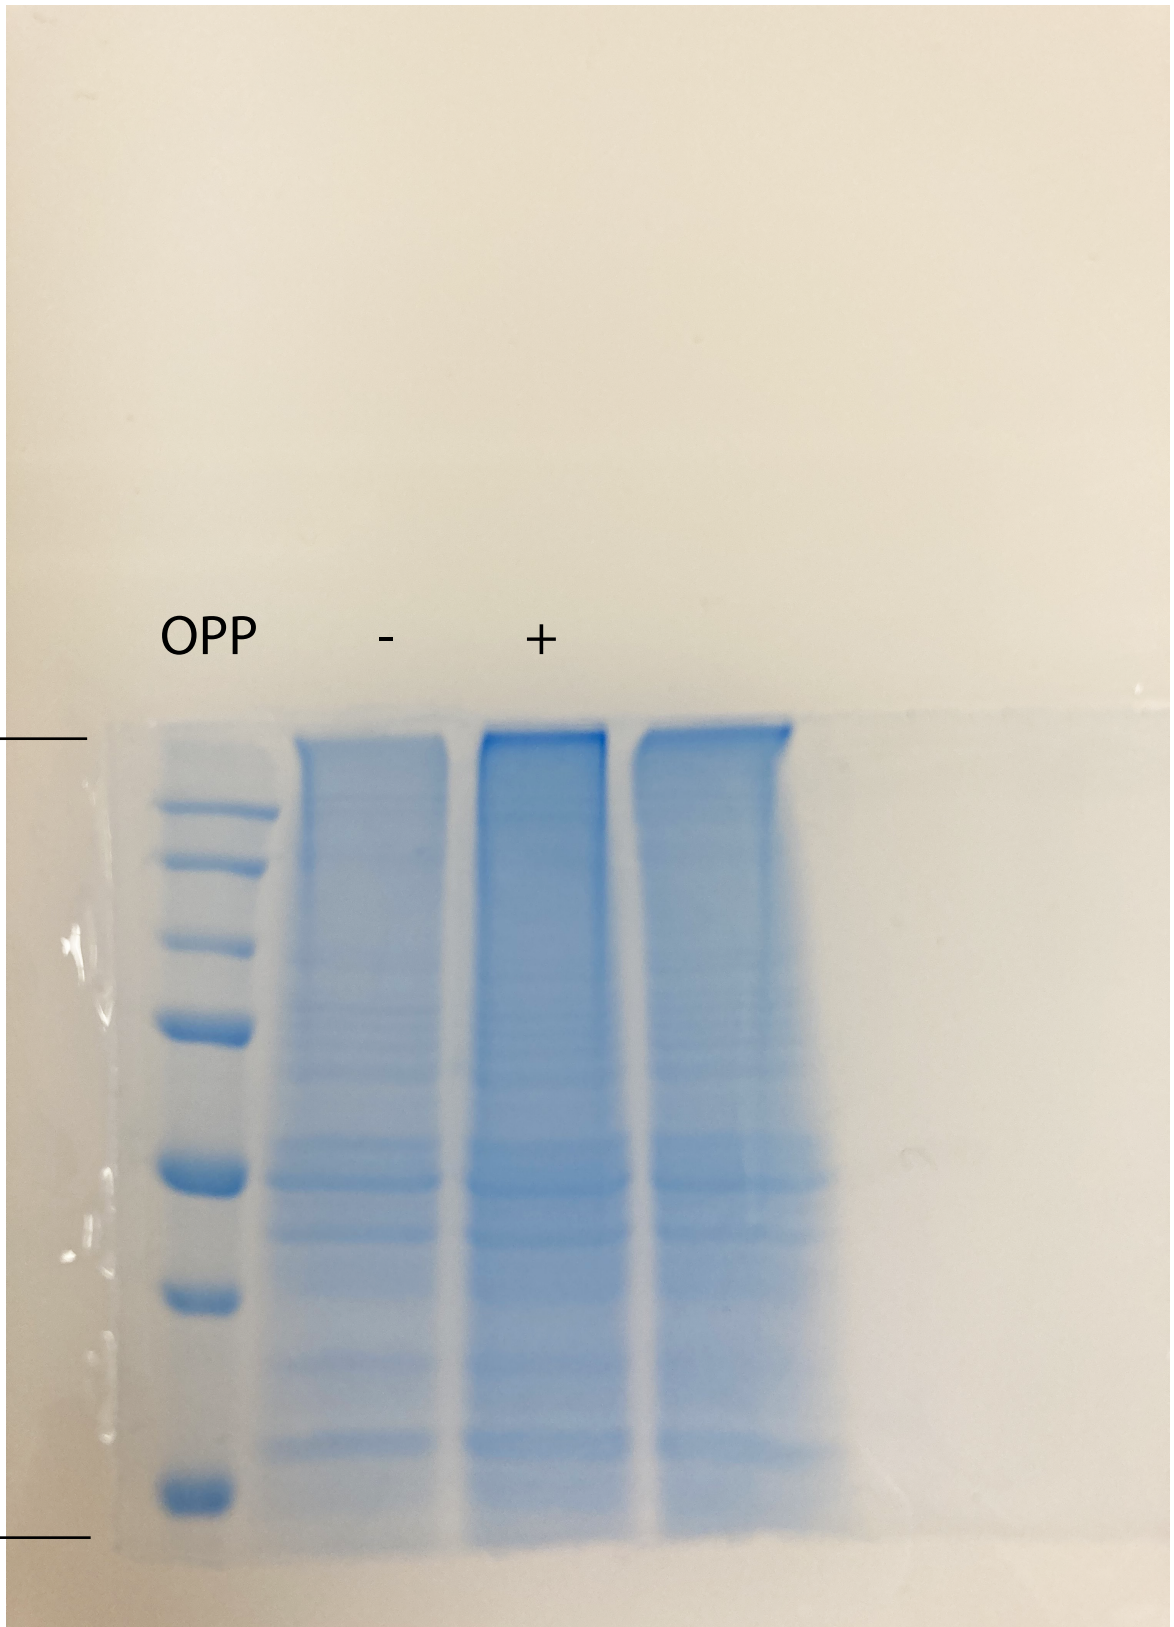

Supplement: fig1-data1 [file elife-83545-fig1-data1-v1.zip]

OPP

-

+

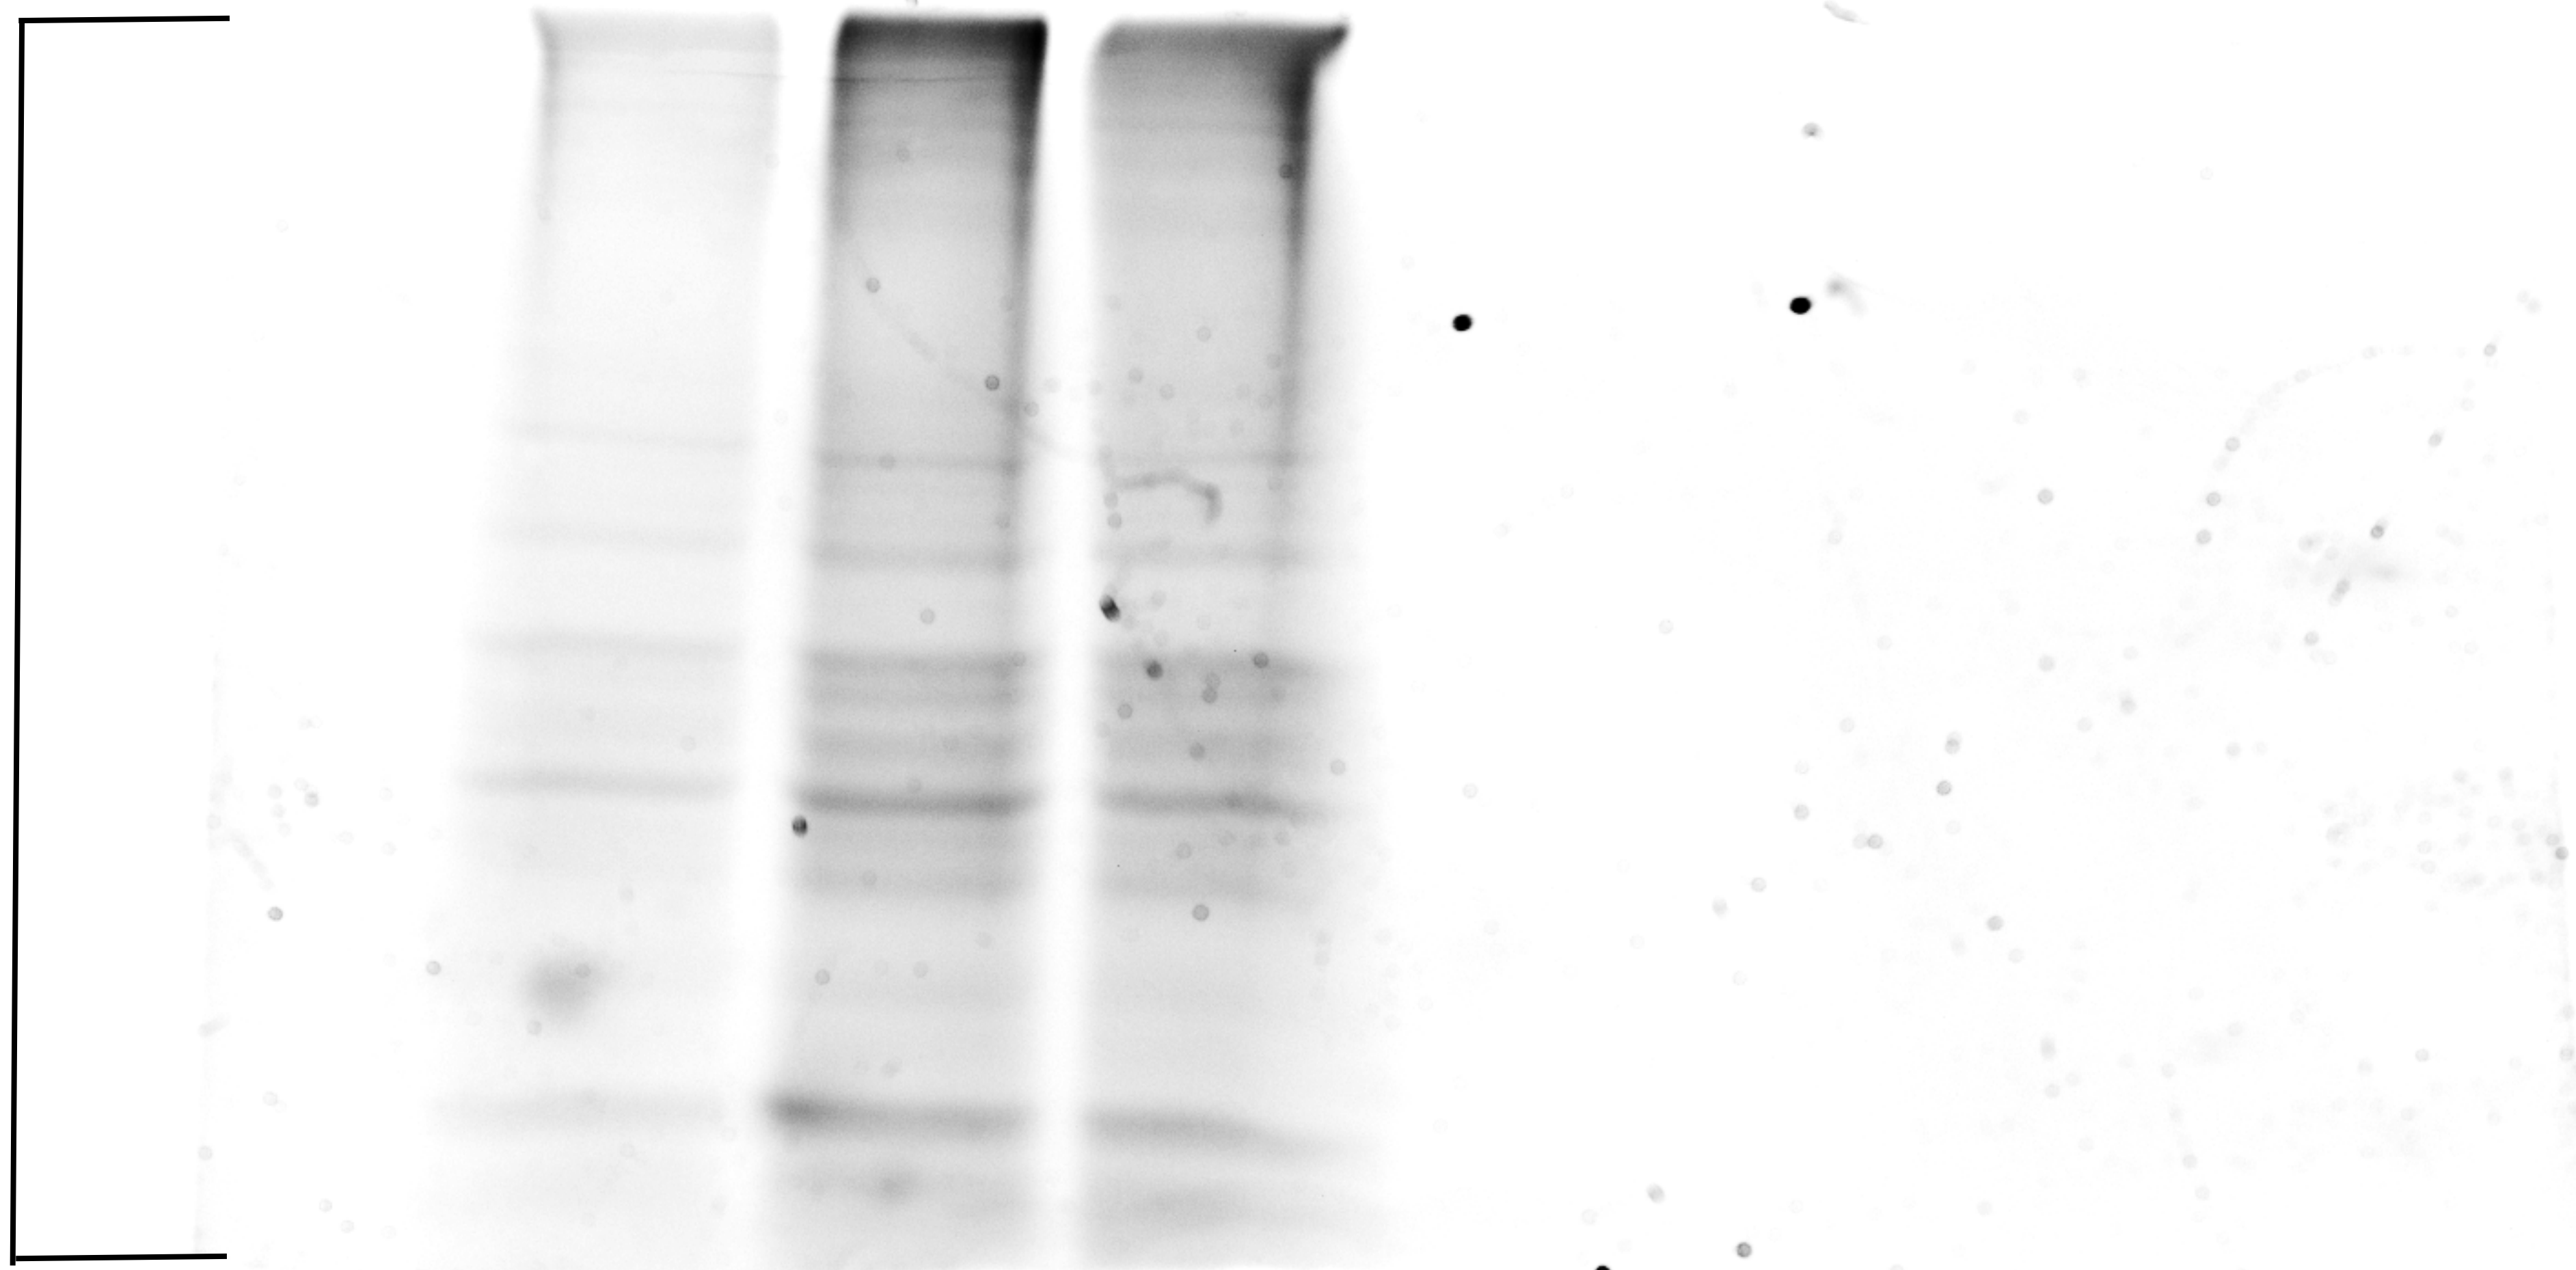

Supplement: fig1-data1 [file elife-83545-fig1-data1-v1.zip]

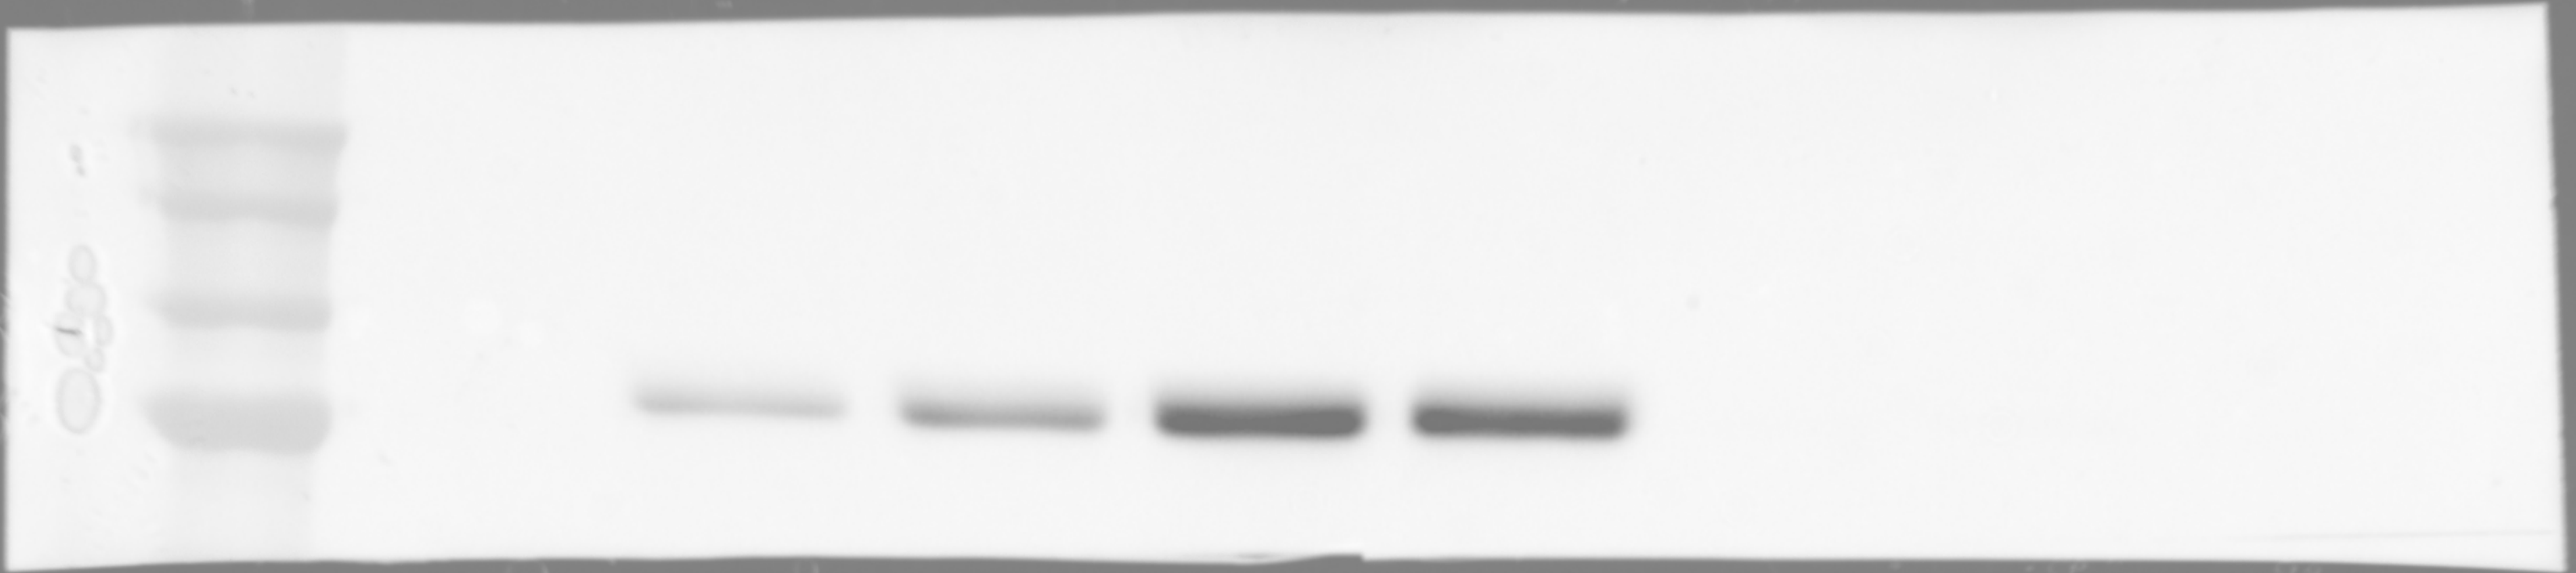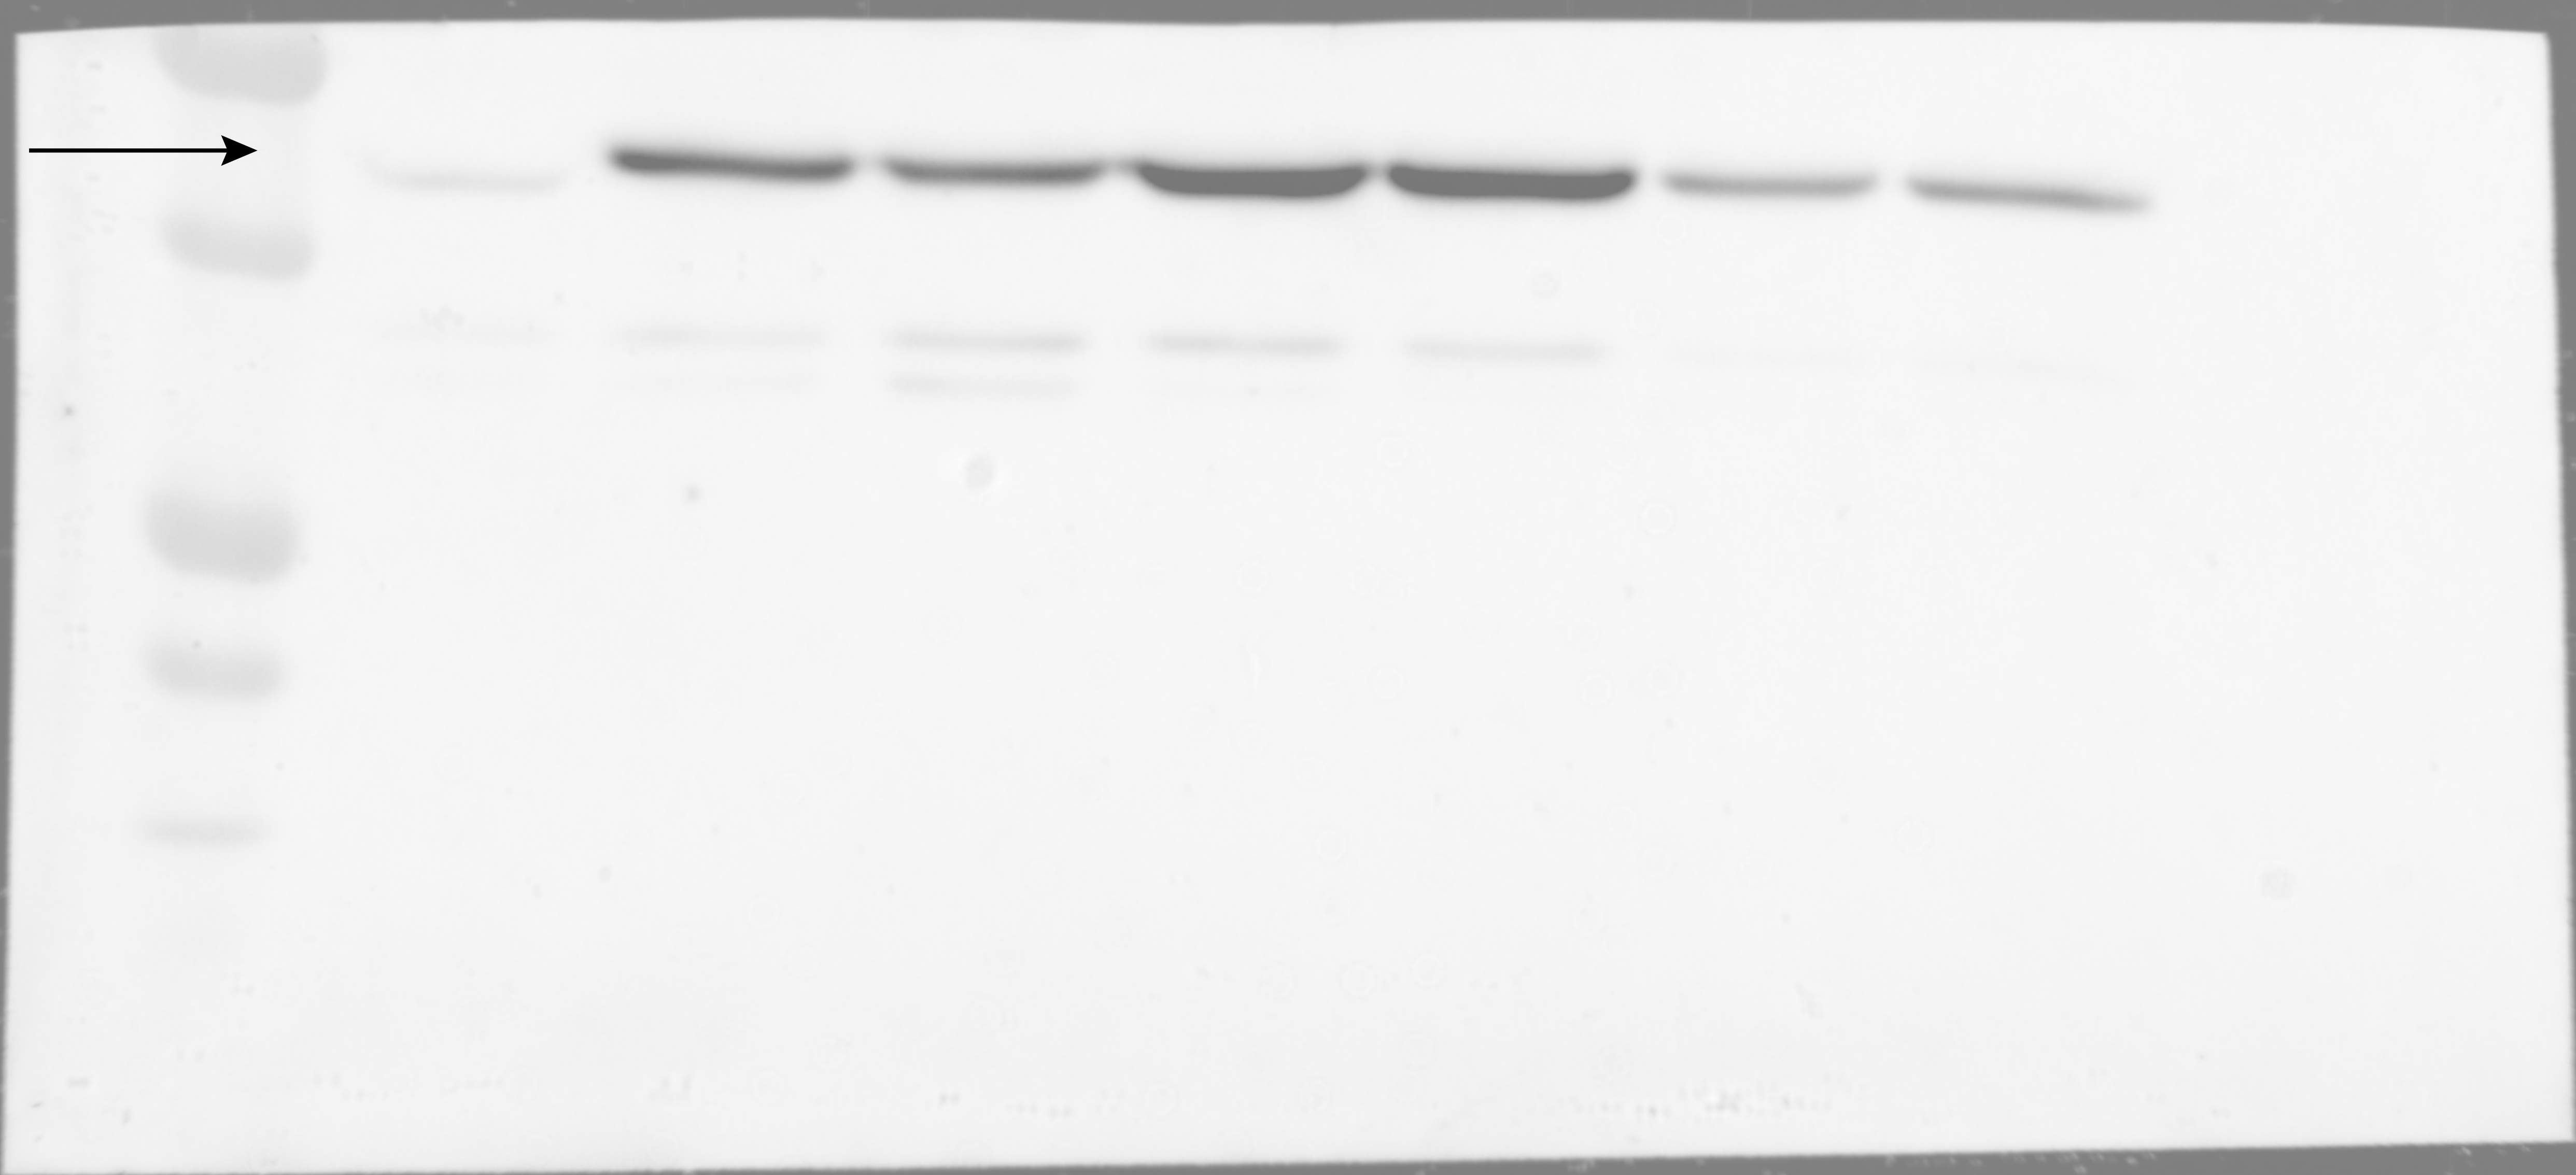

Supplement: fig1-figsupp1-data1 [file elife-83545-fig1-figsupp1-data1-v1.zip]

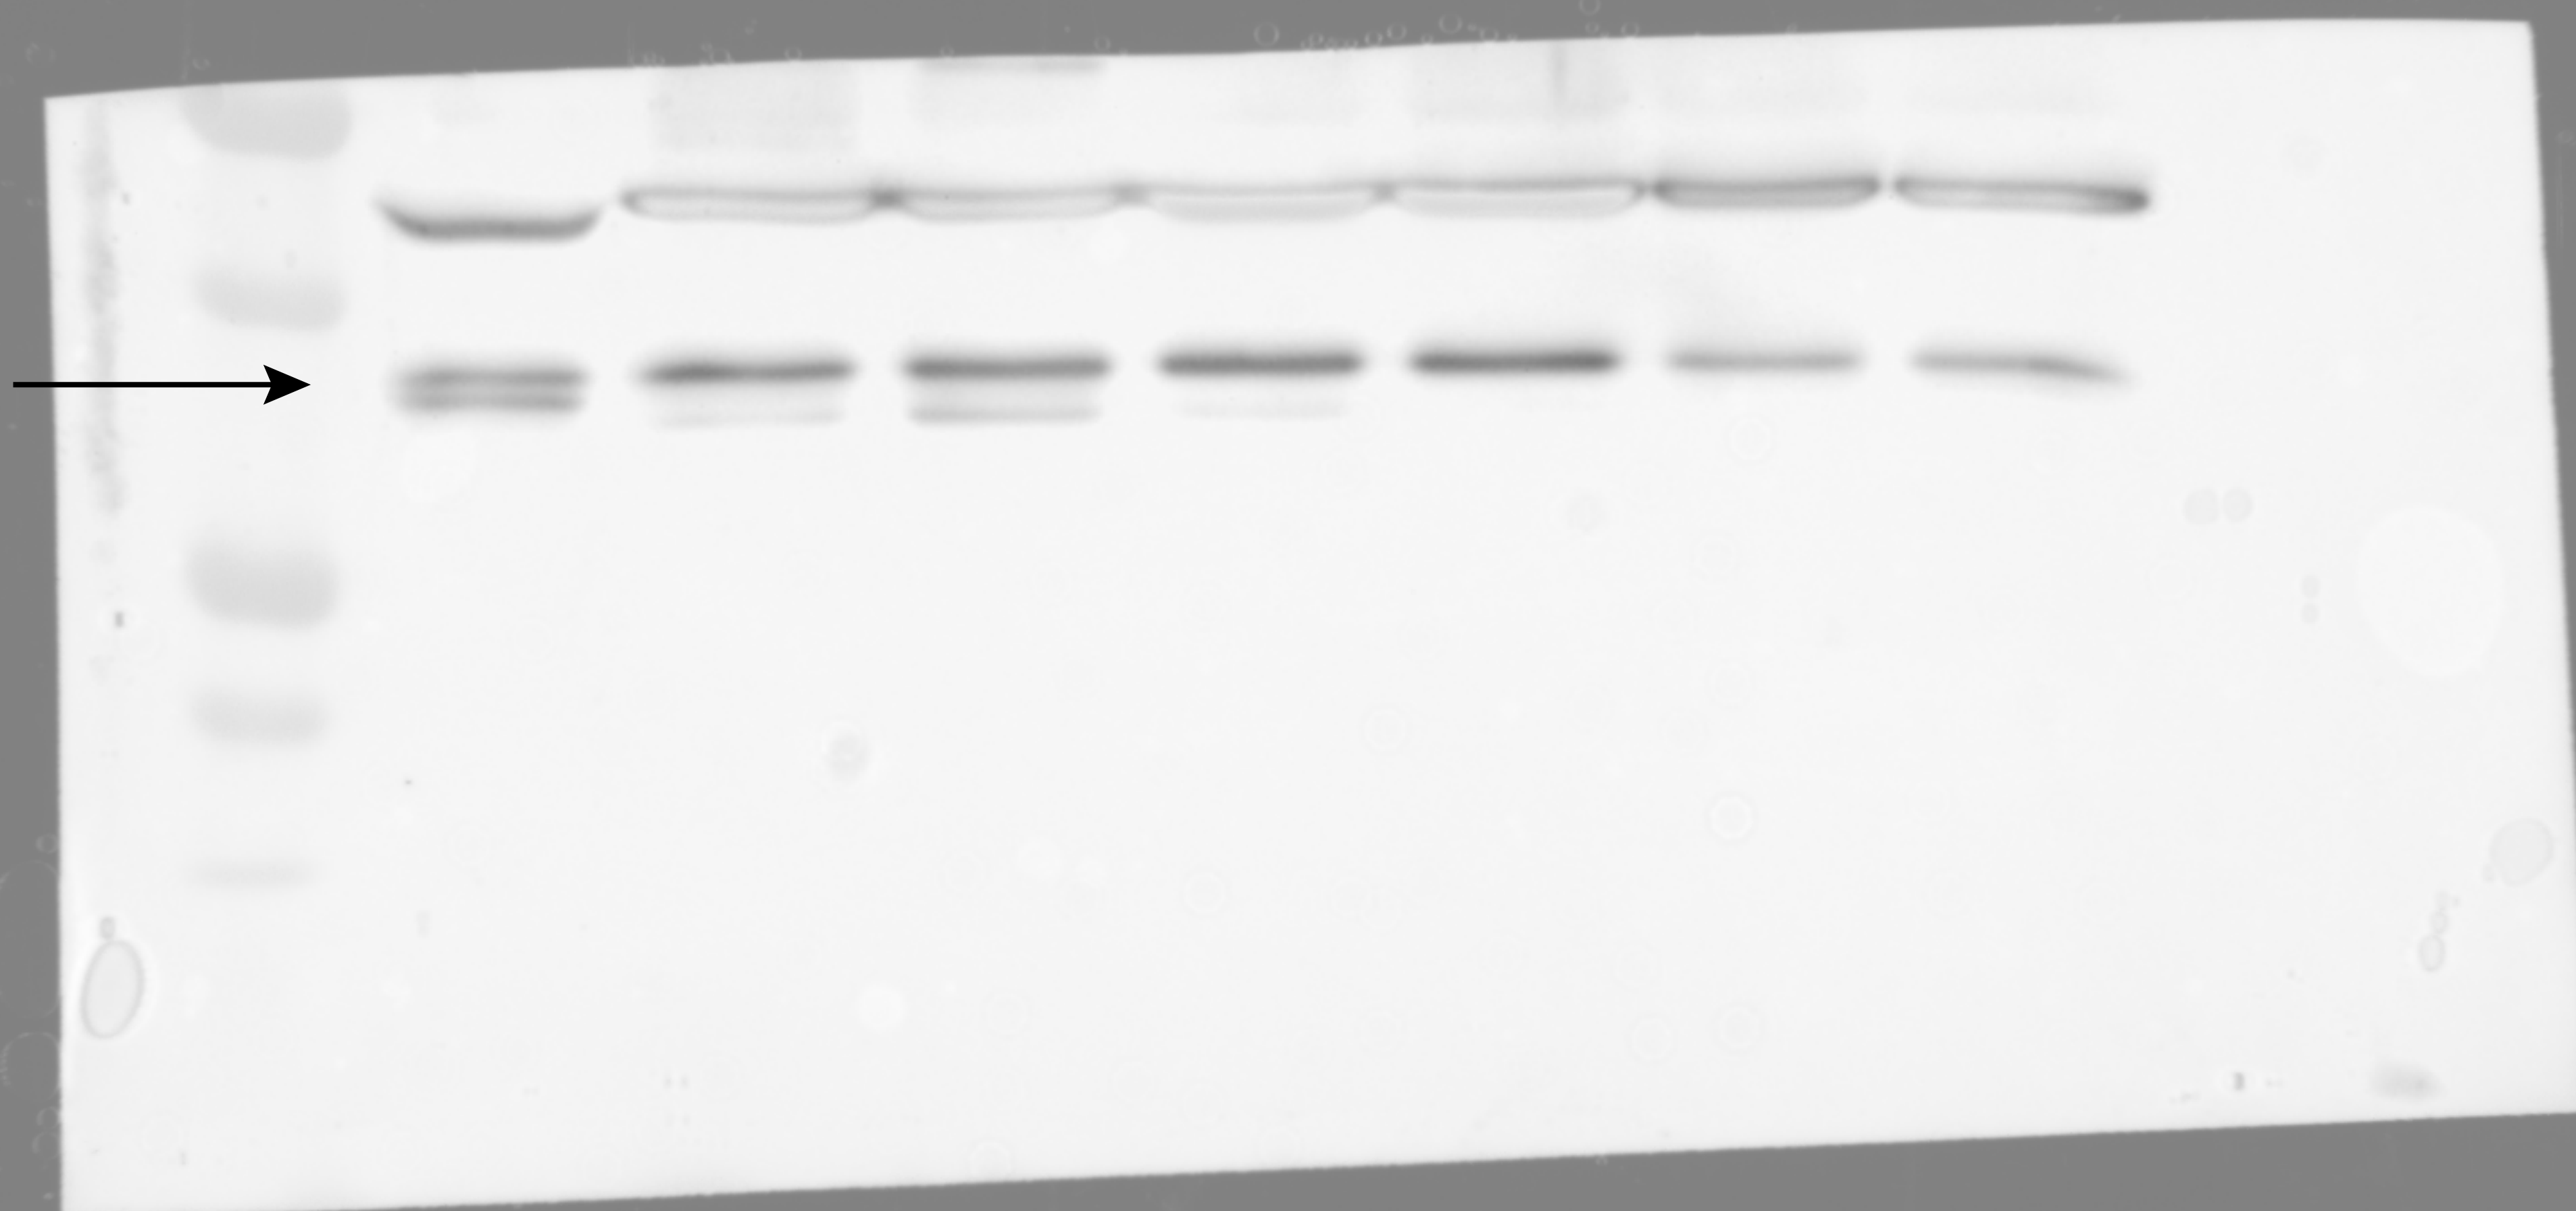

Supplement: fig1-figsupp1-data1 [file elife-83545-fig1-figsupp1-data1-v1.zip]

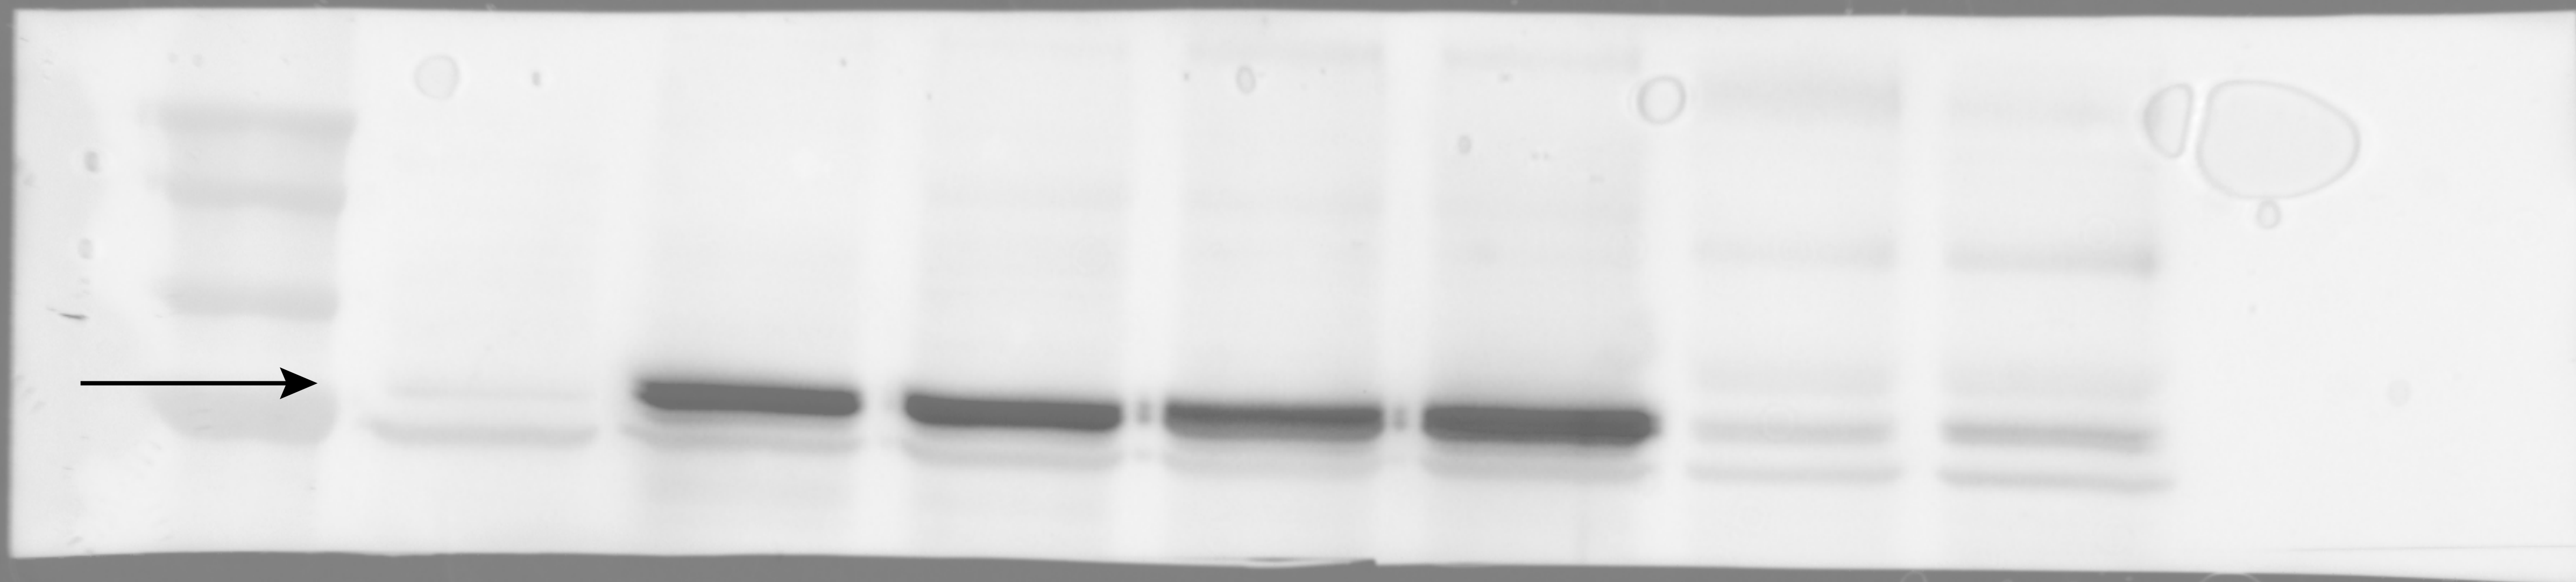

Supplement: fig1-figsupp1-data1 [file elife-83545-fig1-figsupp1-data1-v1.zip]

PhAc-OPP

0

50

100

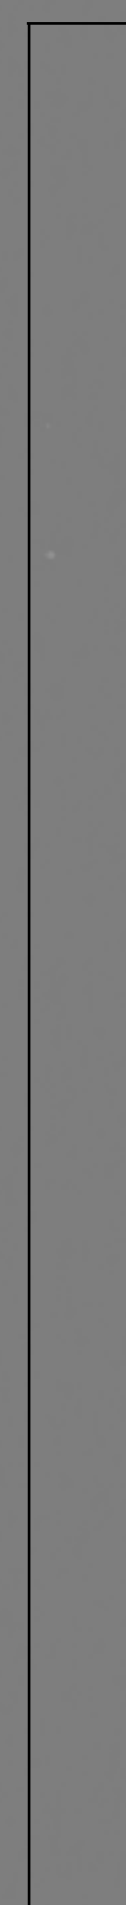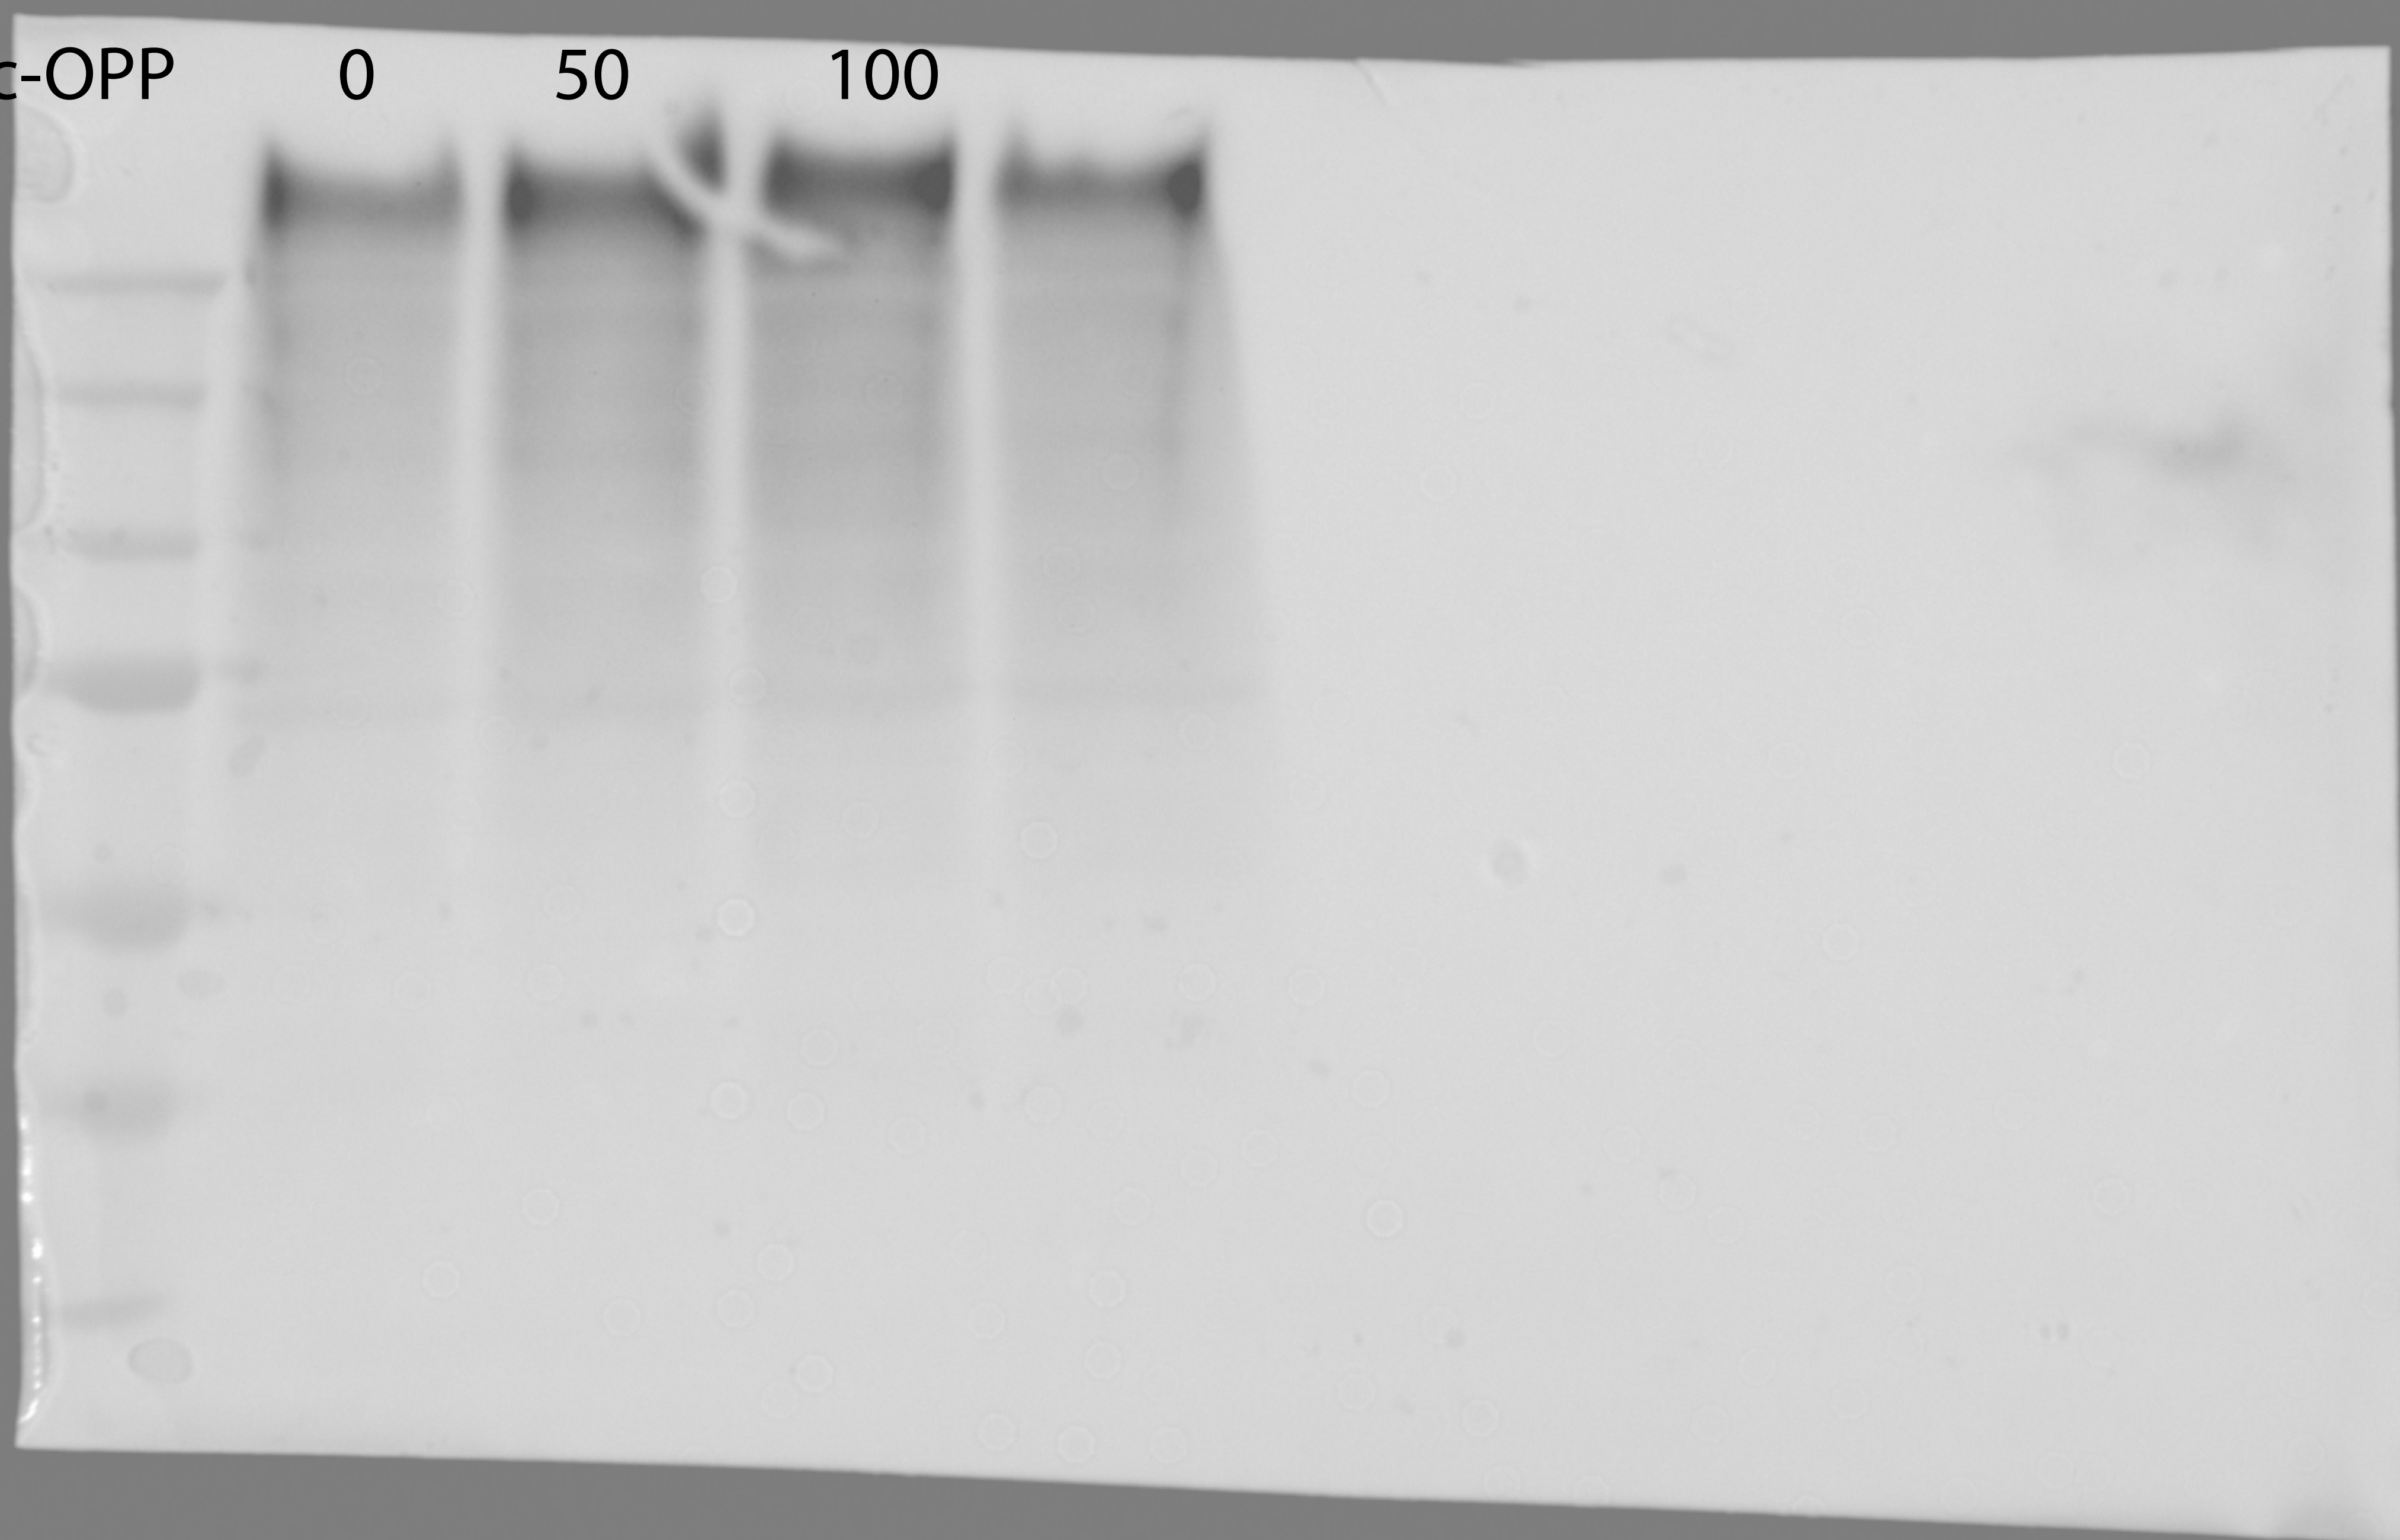

Supplement: fig2-data1 [file elife-83545-fig2-data1-v1.zip]

PhAc-OPP

0

50

100

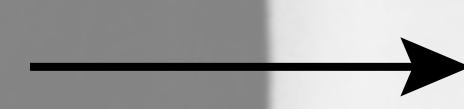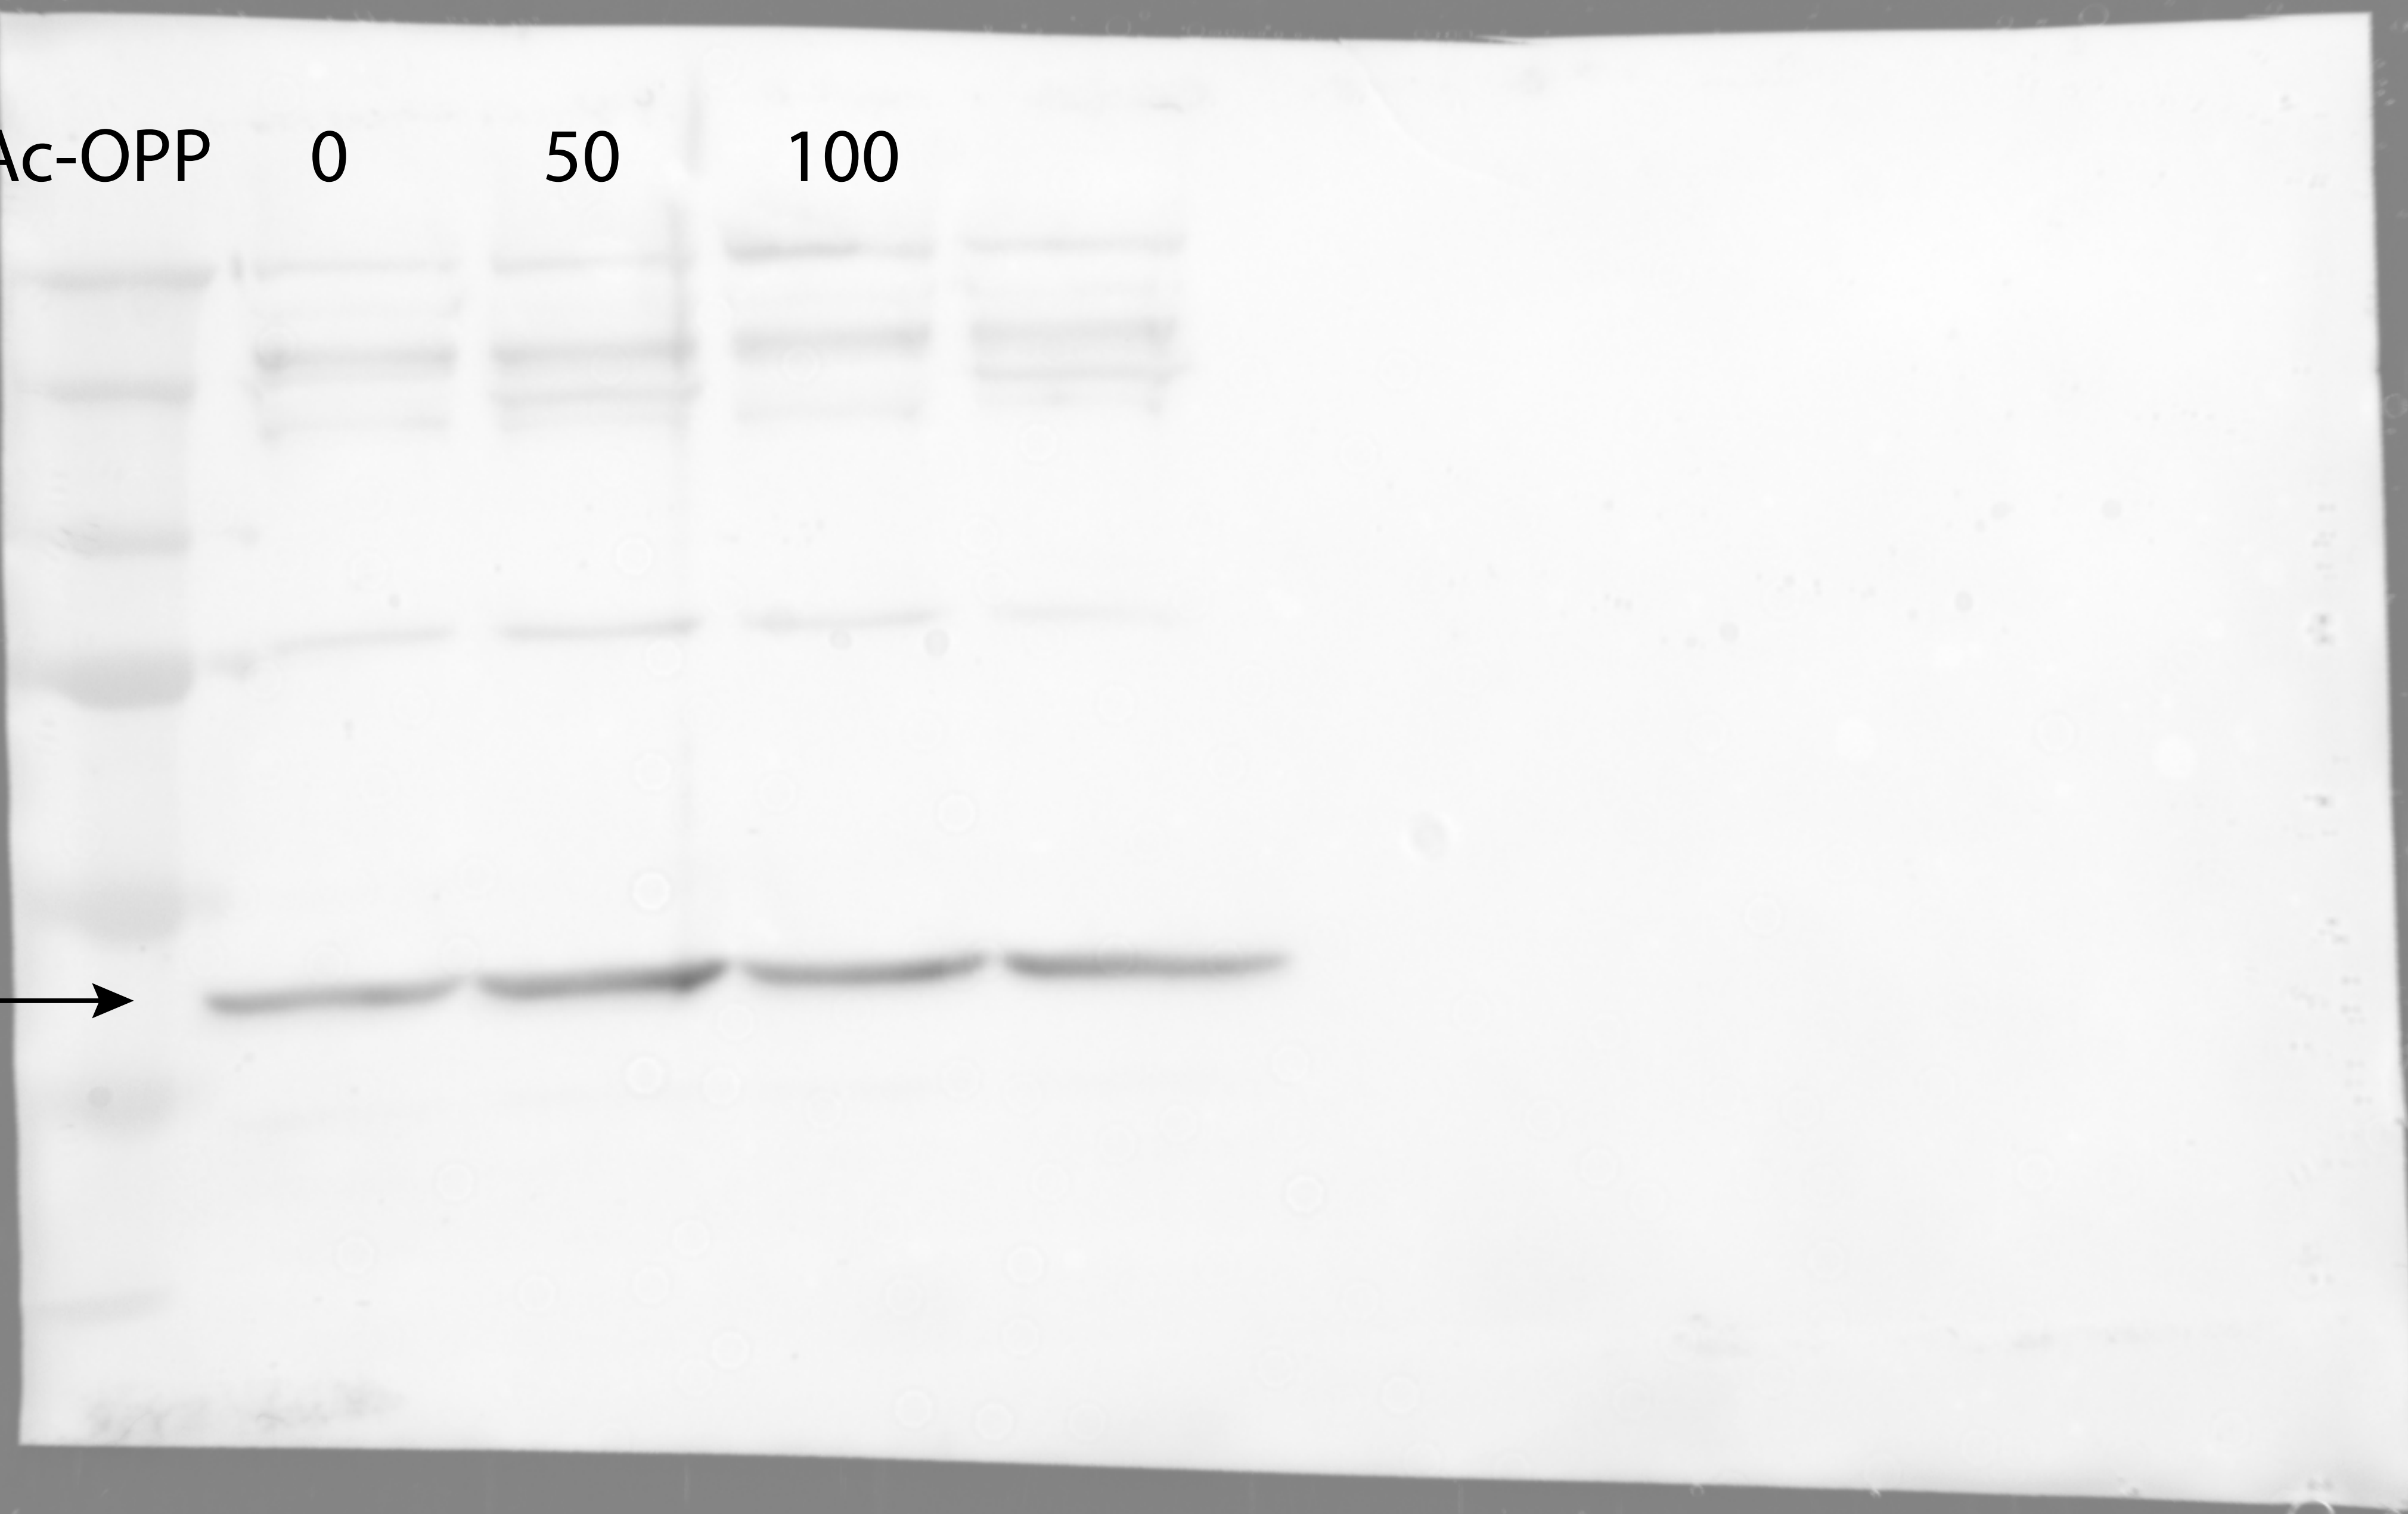

Supplement: fig2-data1 [file elife-83545-fig2-data1-v1.zip]

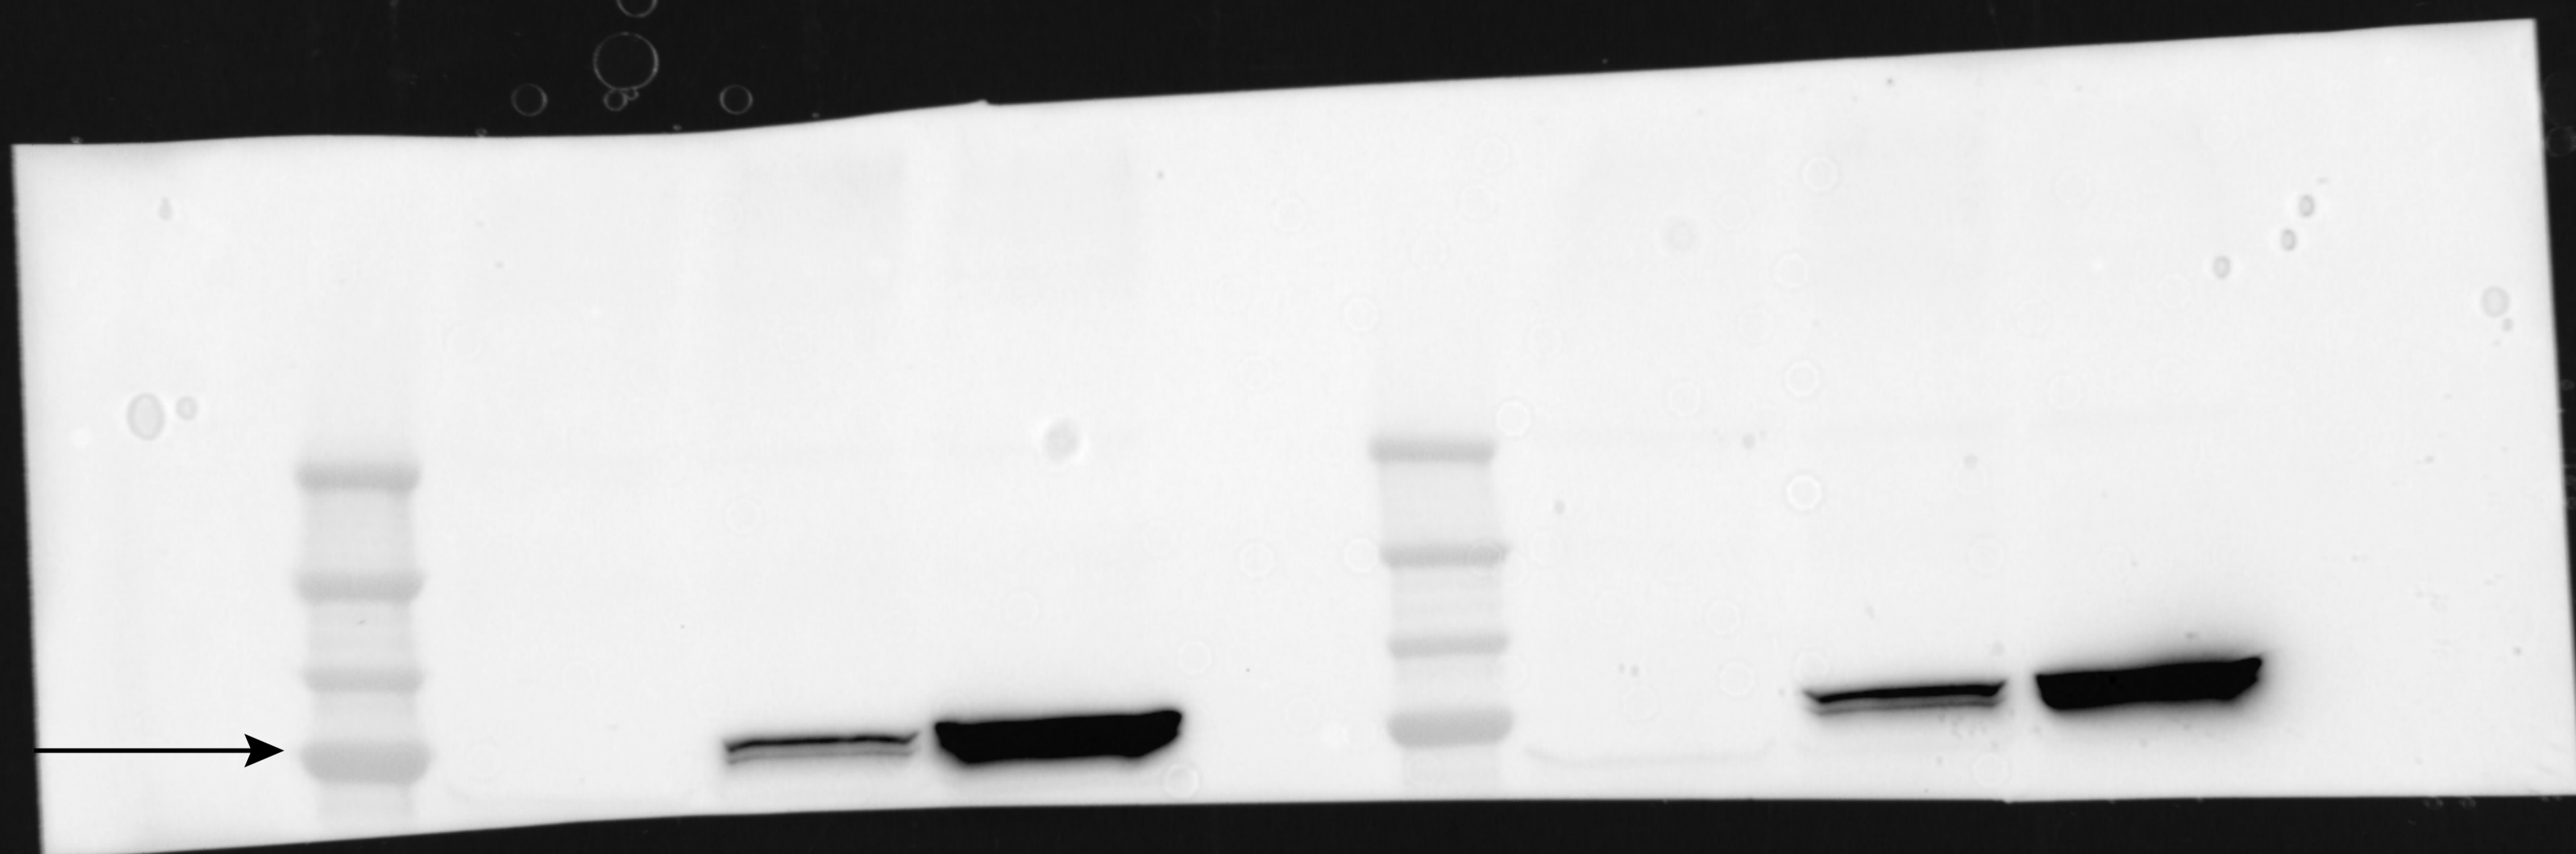

Supplement: fig2-figsupp1-data1 [file elife-83545-fig2-figsupp1-data1-v1.zip]

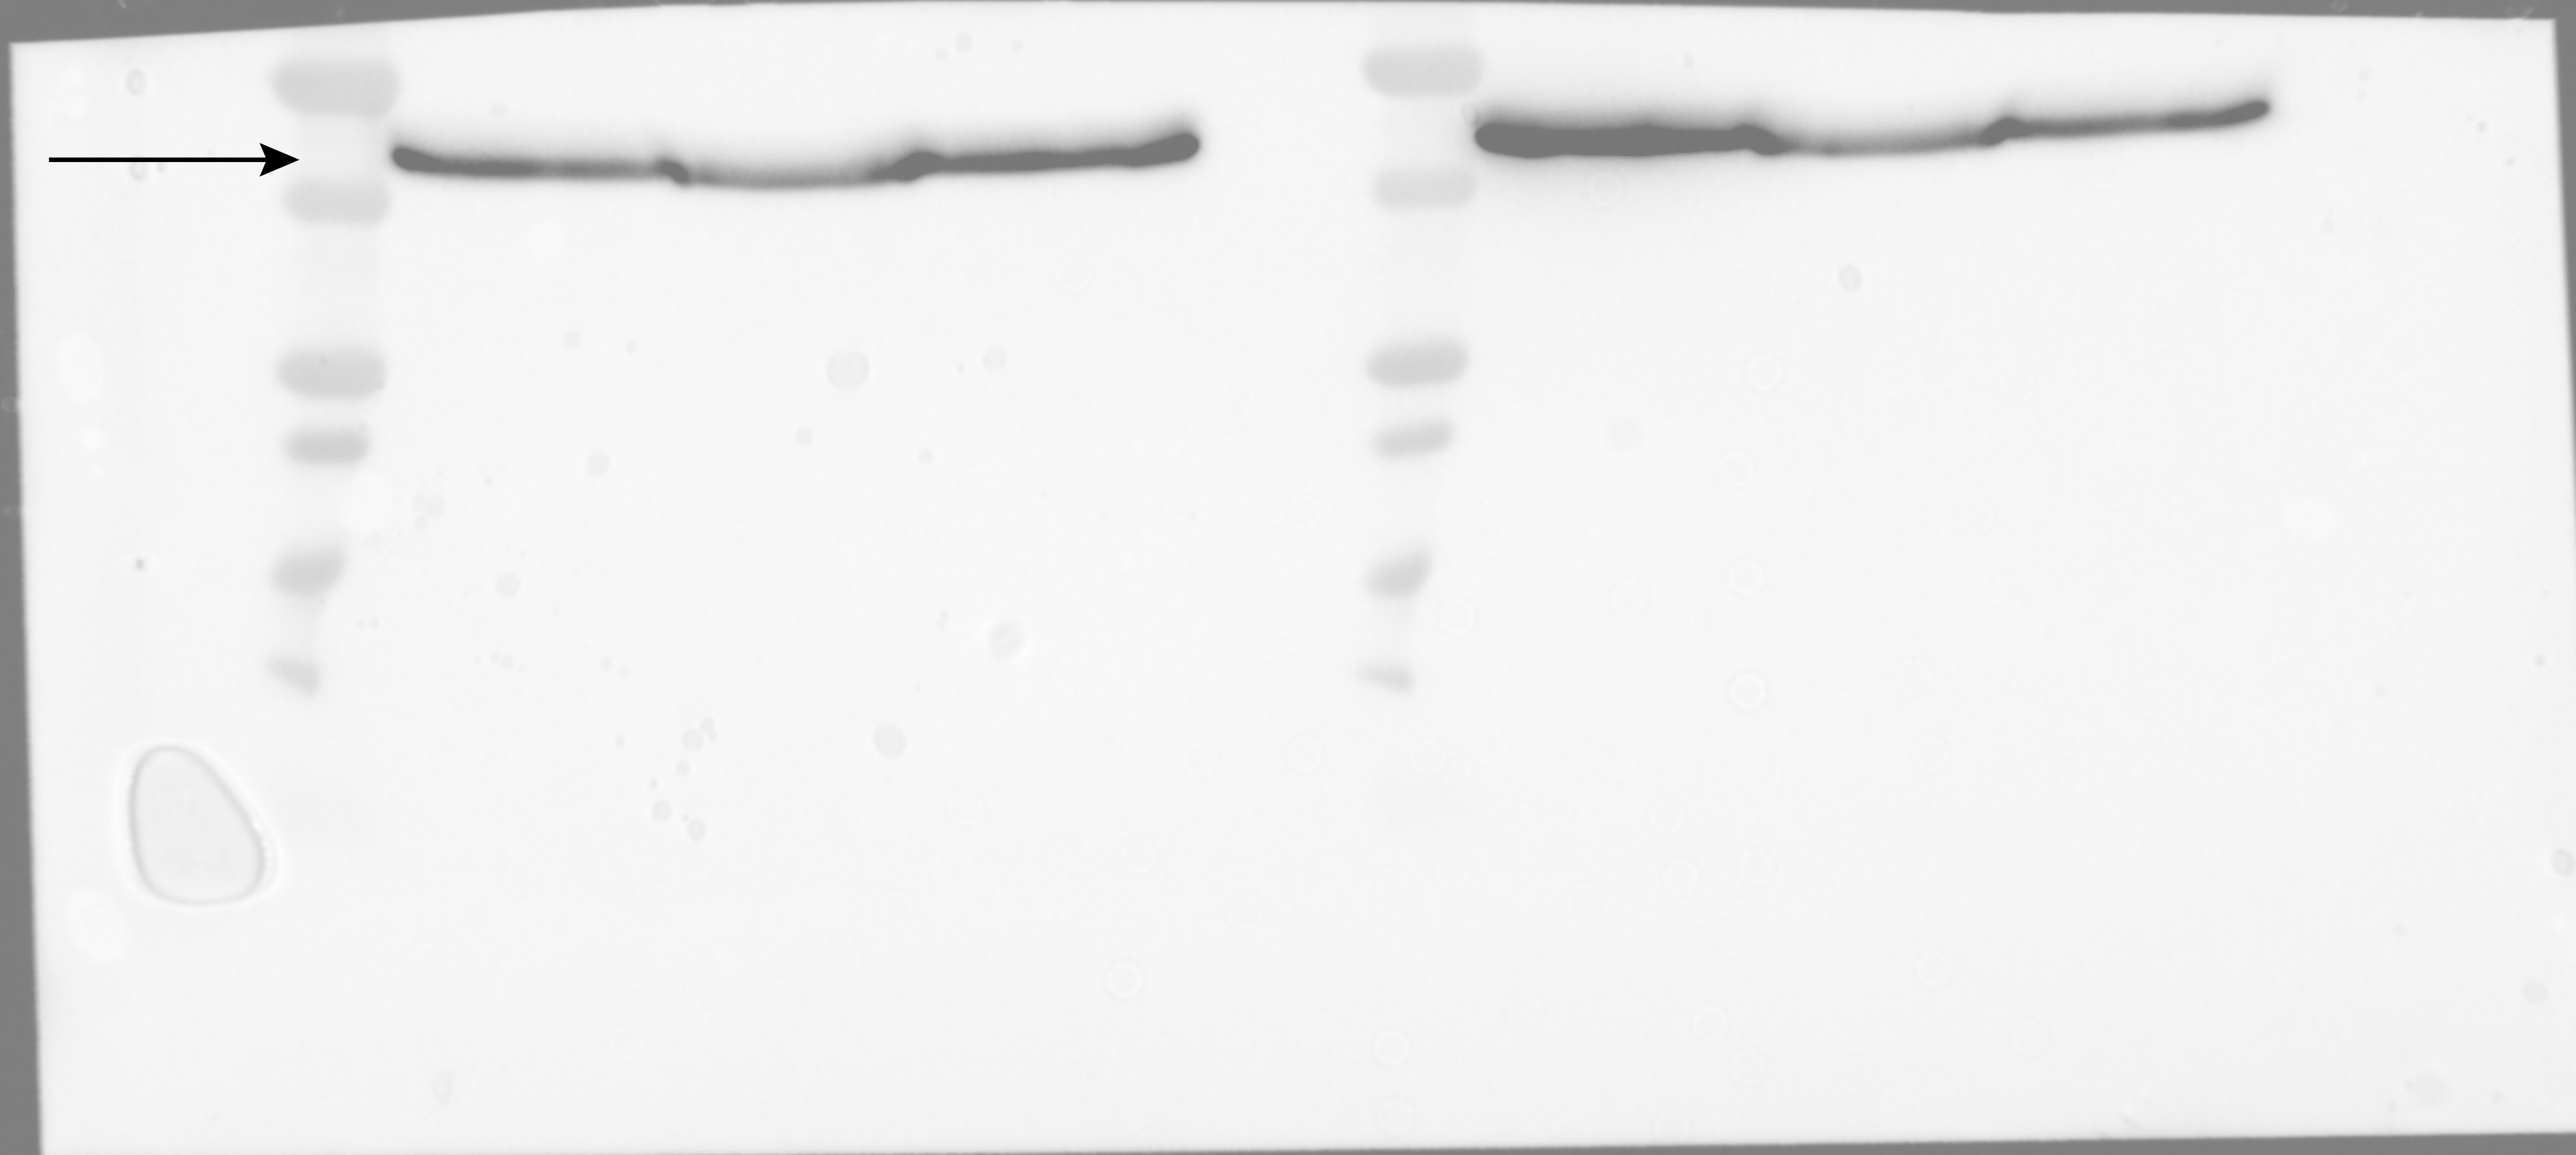

Supplement: fig2-figsupp1-data1 [file elife-83545-fig2-figsupp1-data1-v1.zip]

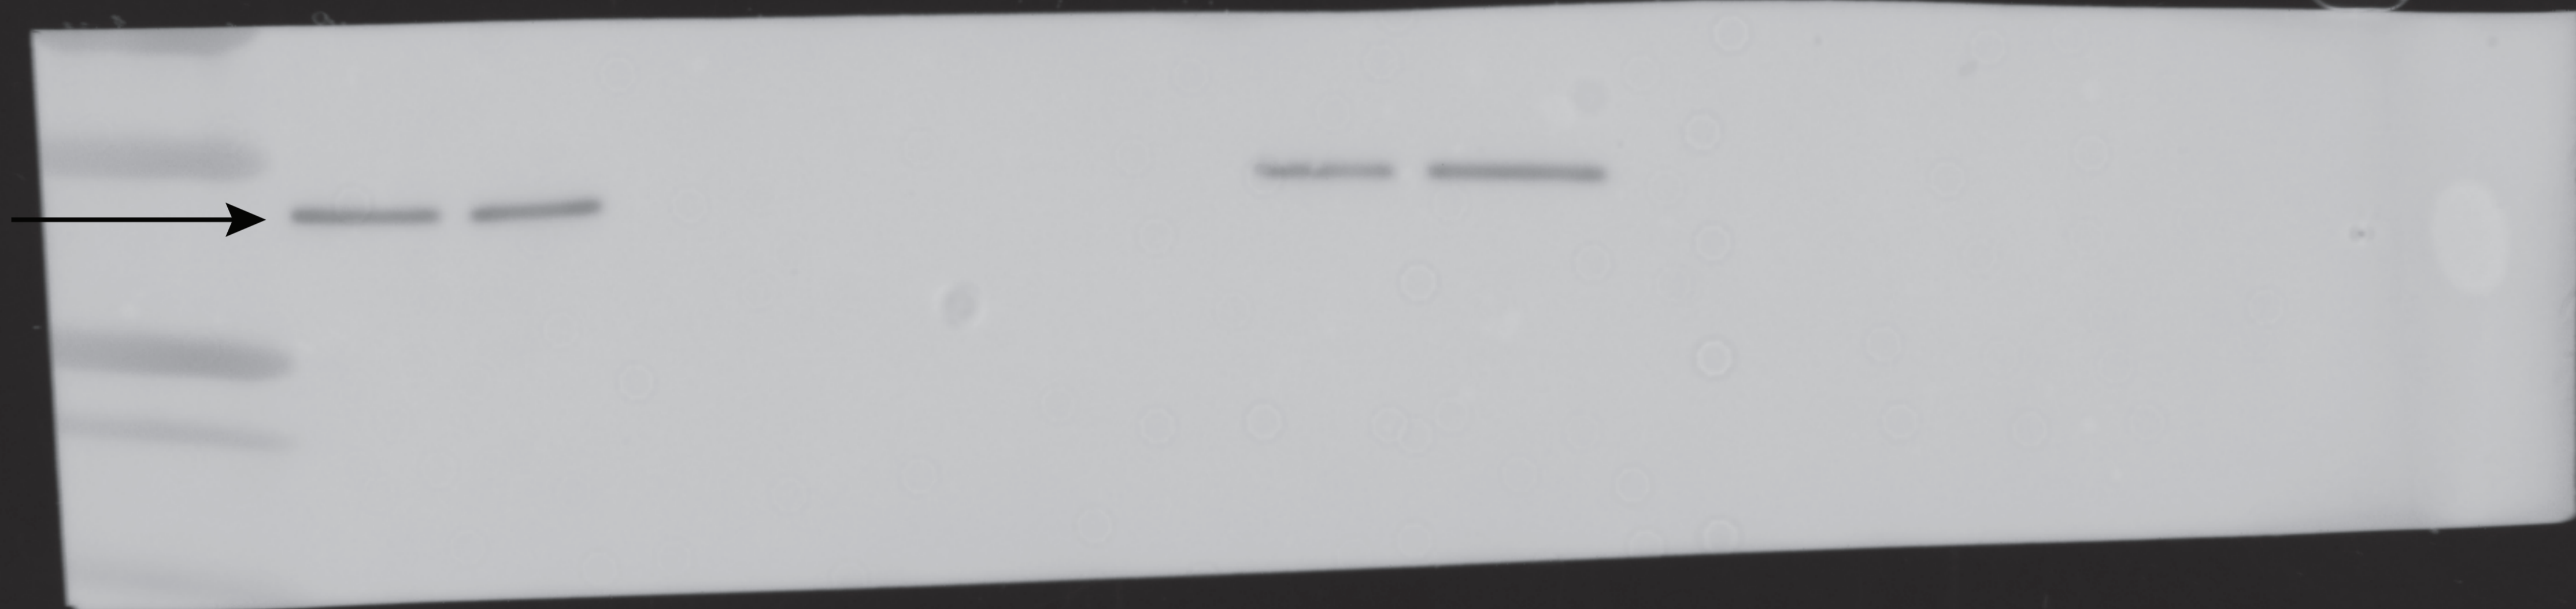

Supplement: fig4-data1 [file elife-83545-fig4-data1-v1.zip]

PhAc-OPP

ELUATE

-

+

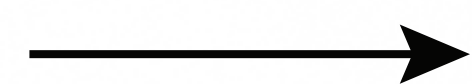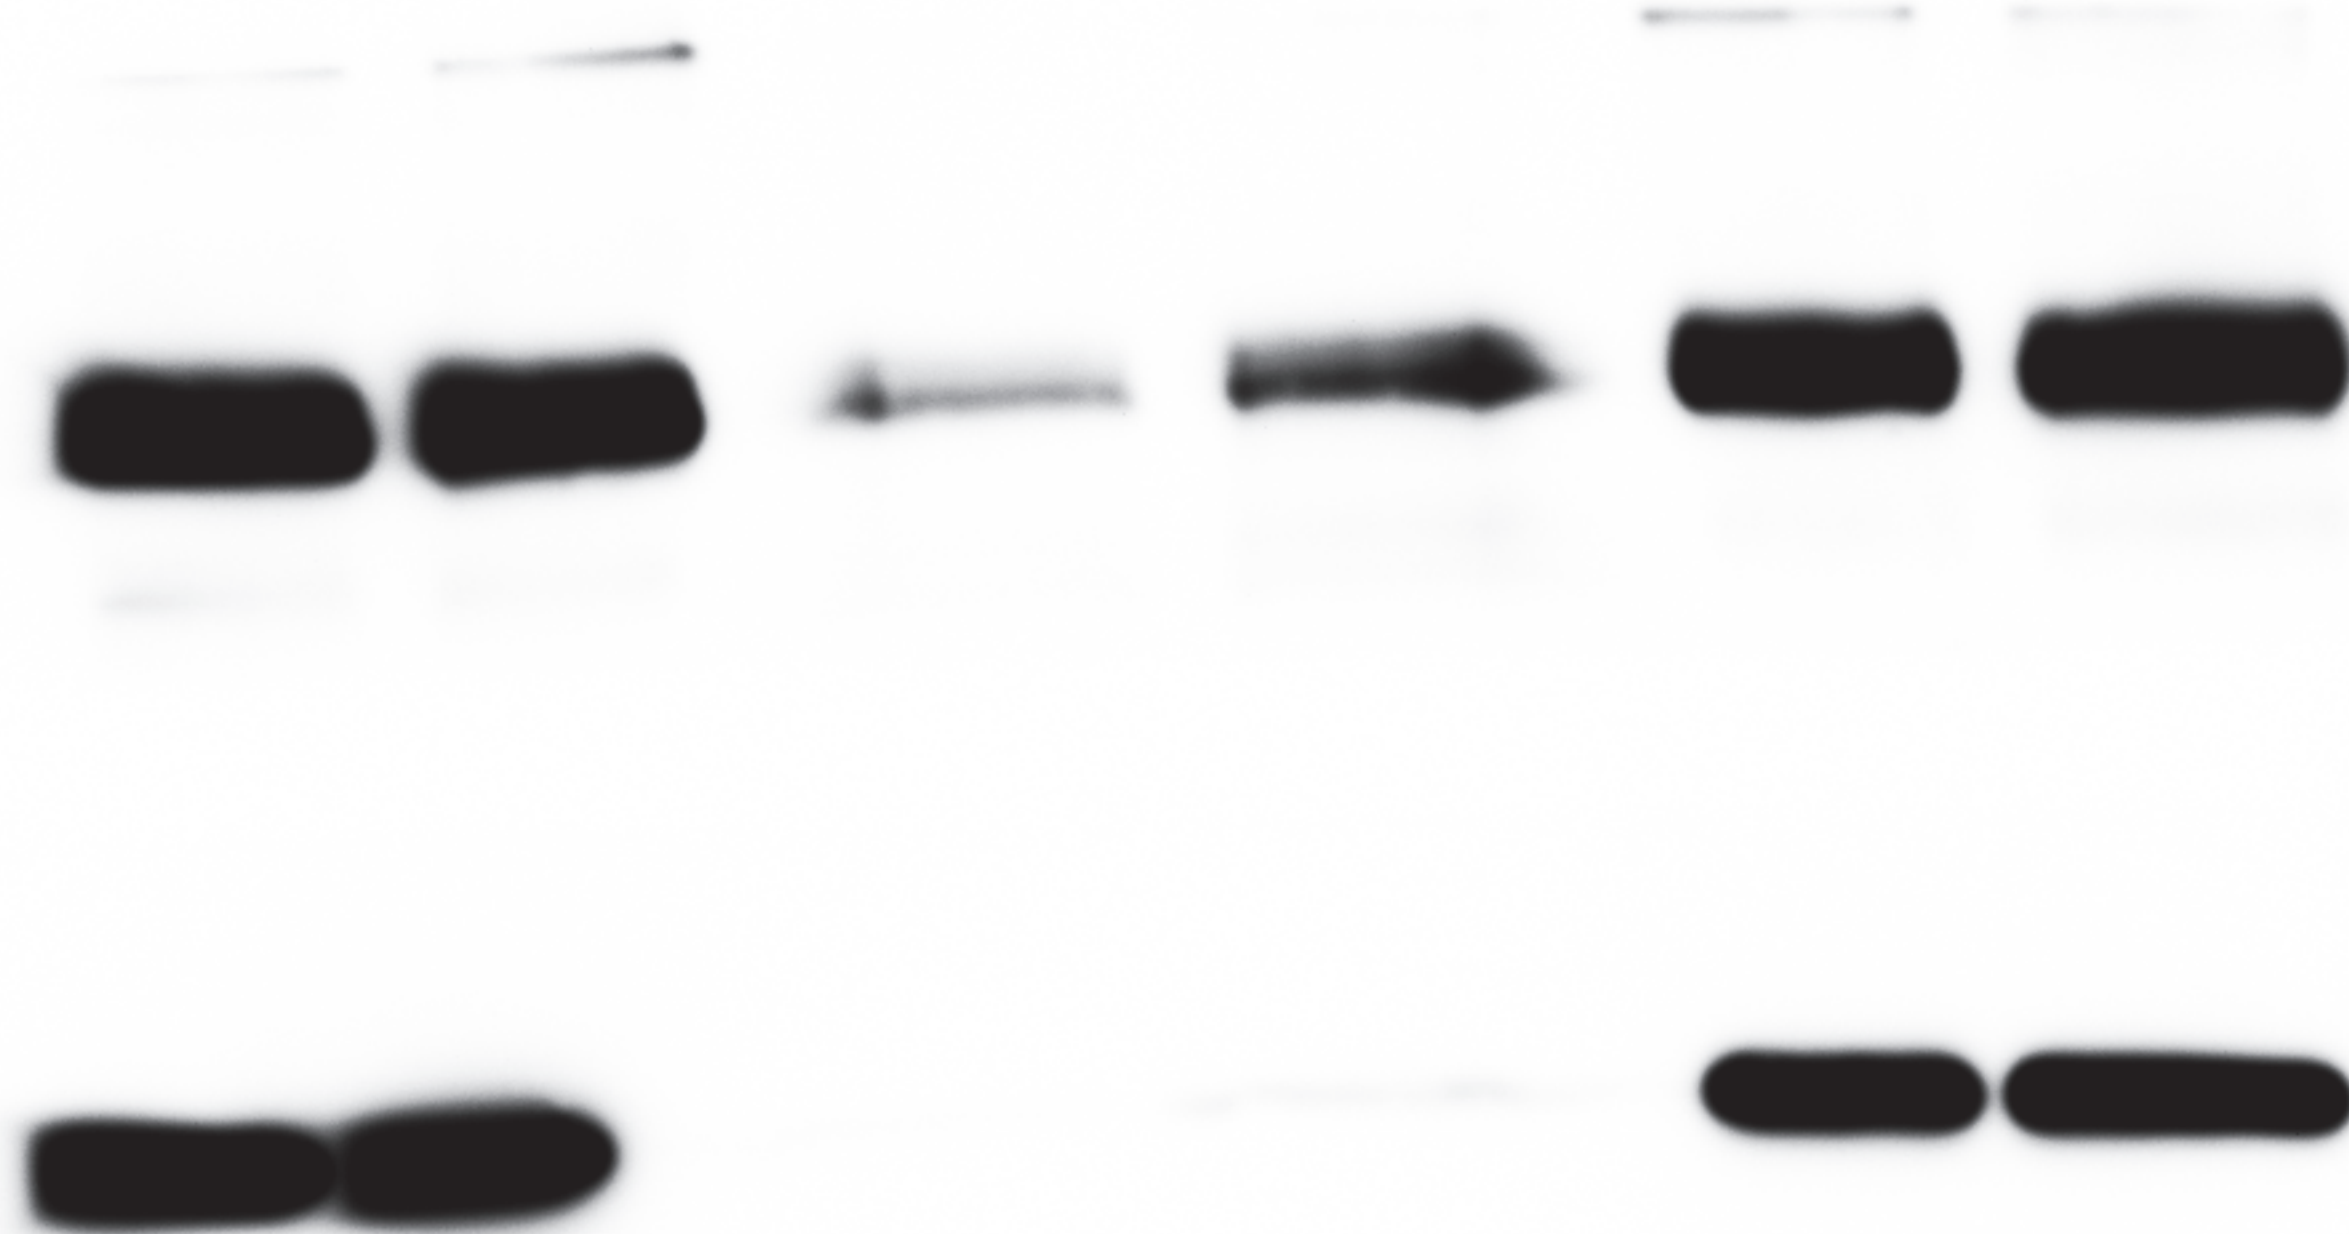

Supplement: fig4-data1 [file elife-83545-fig4-data1-v1.zip]

PhAc-OPP

|  | input |   | eluate |   |
|--|-------|---|--------|---|
|  | -     | + | -      | + |

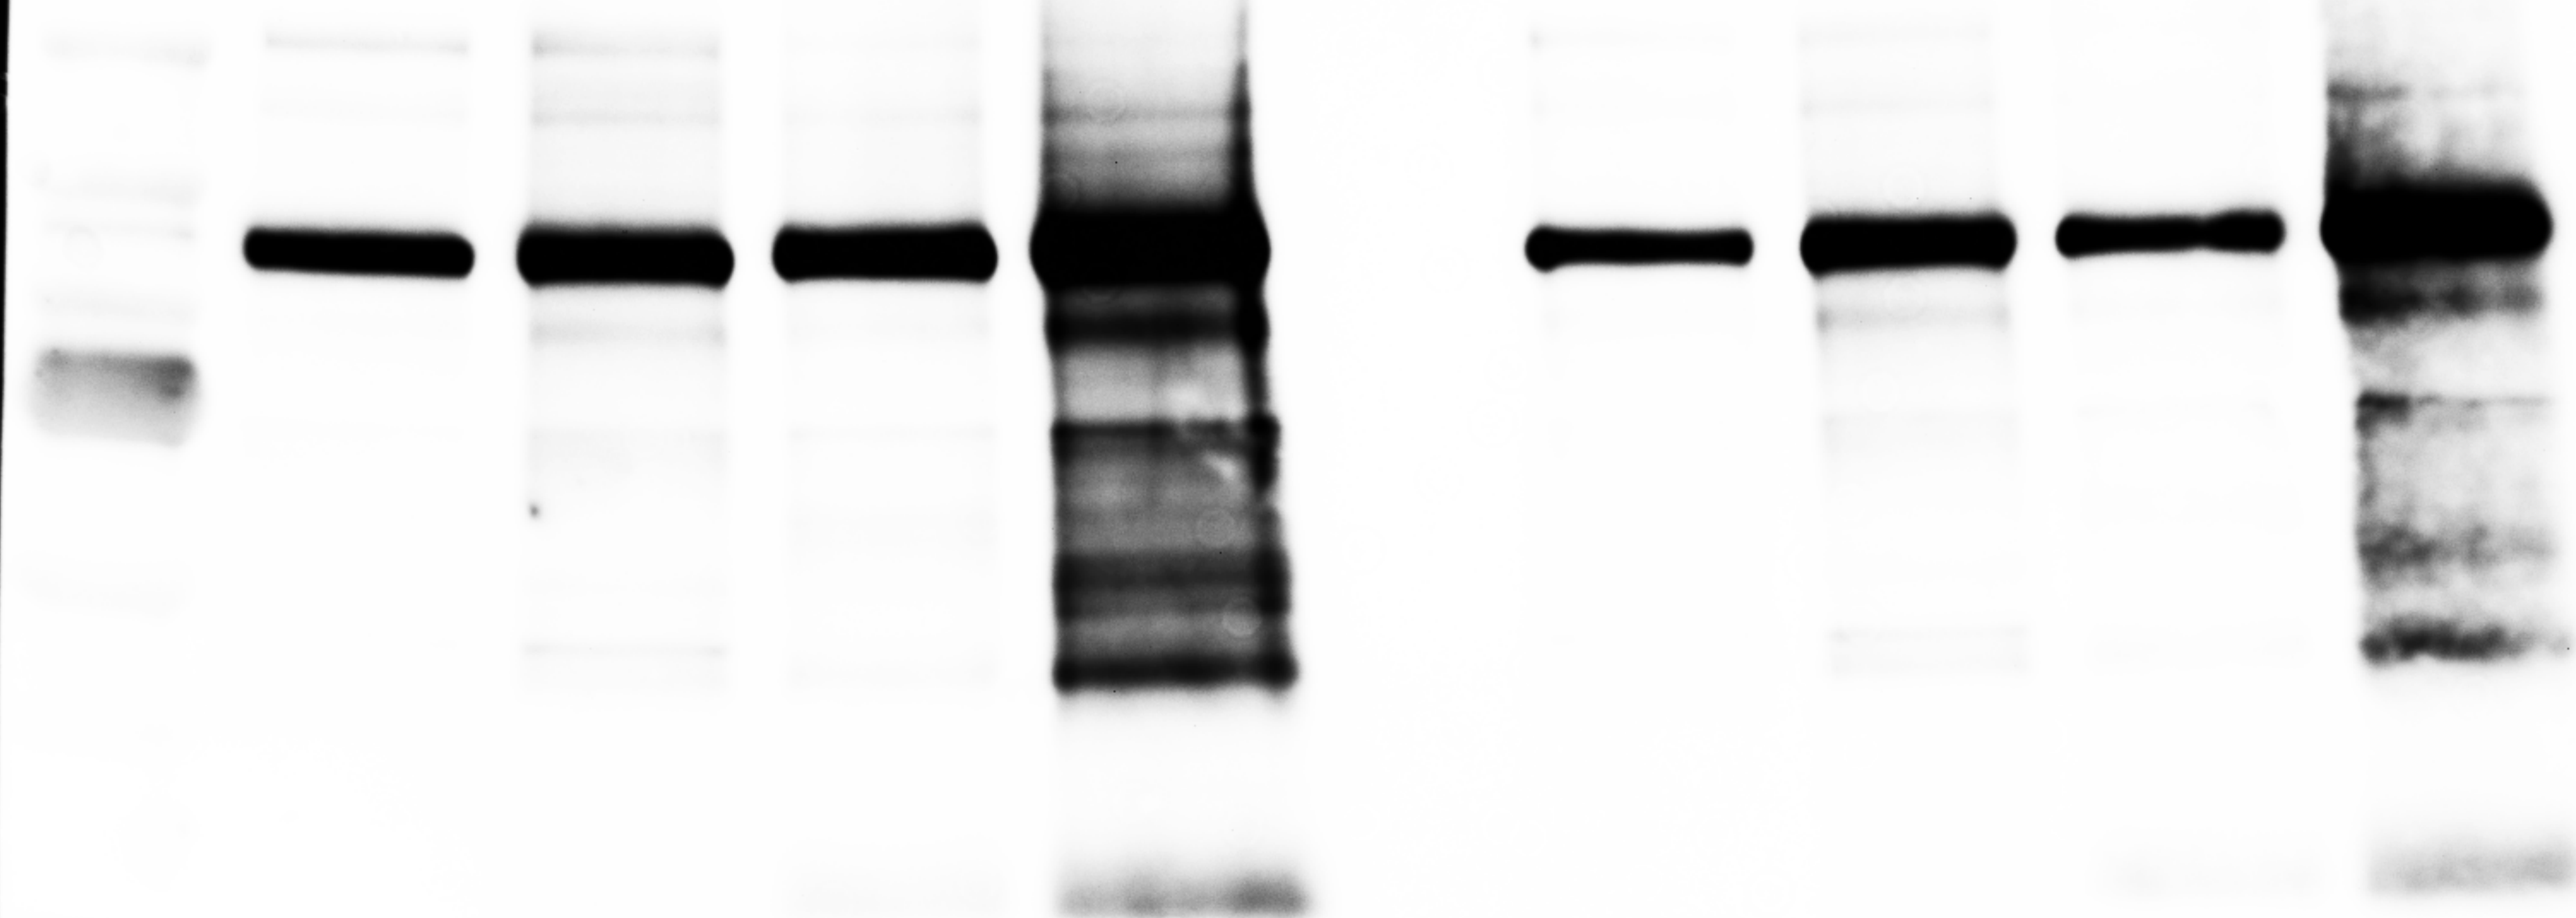

Supplement: fig4-data1 [file elife-83545-fig4-data1-v1.zip]

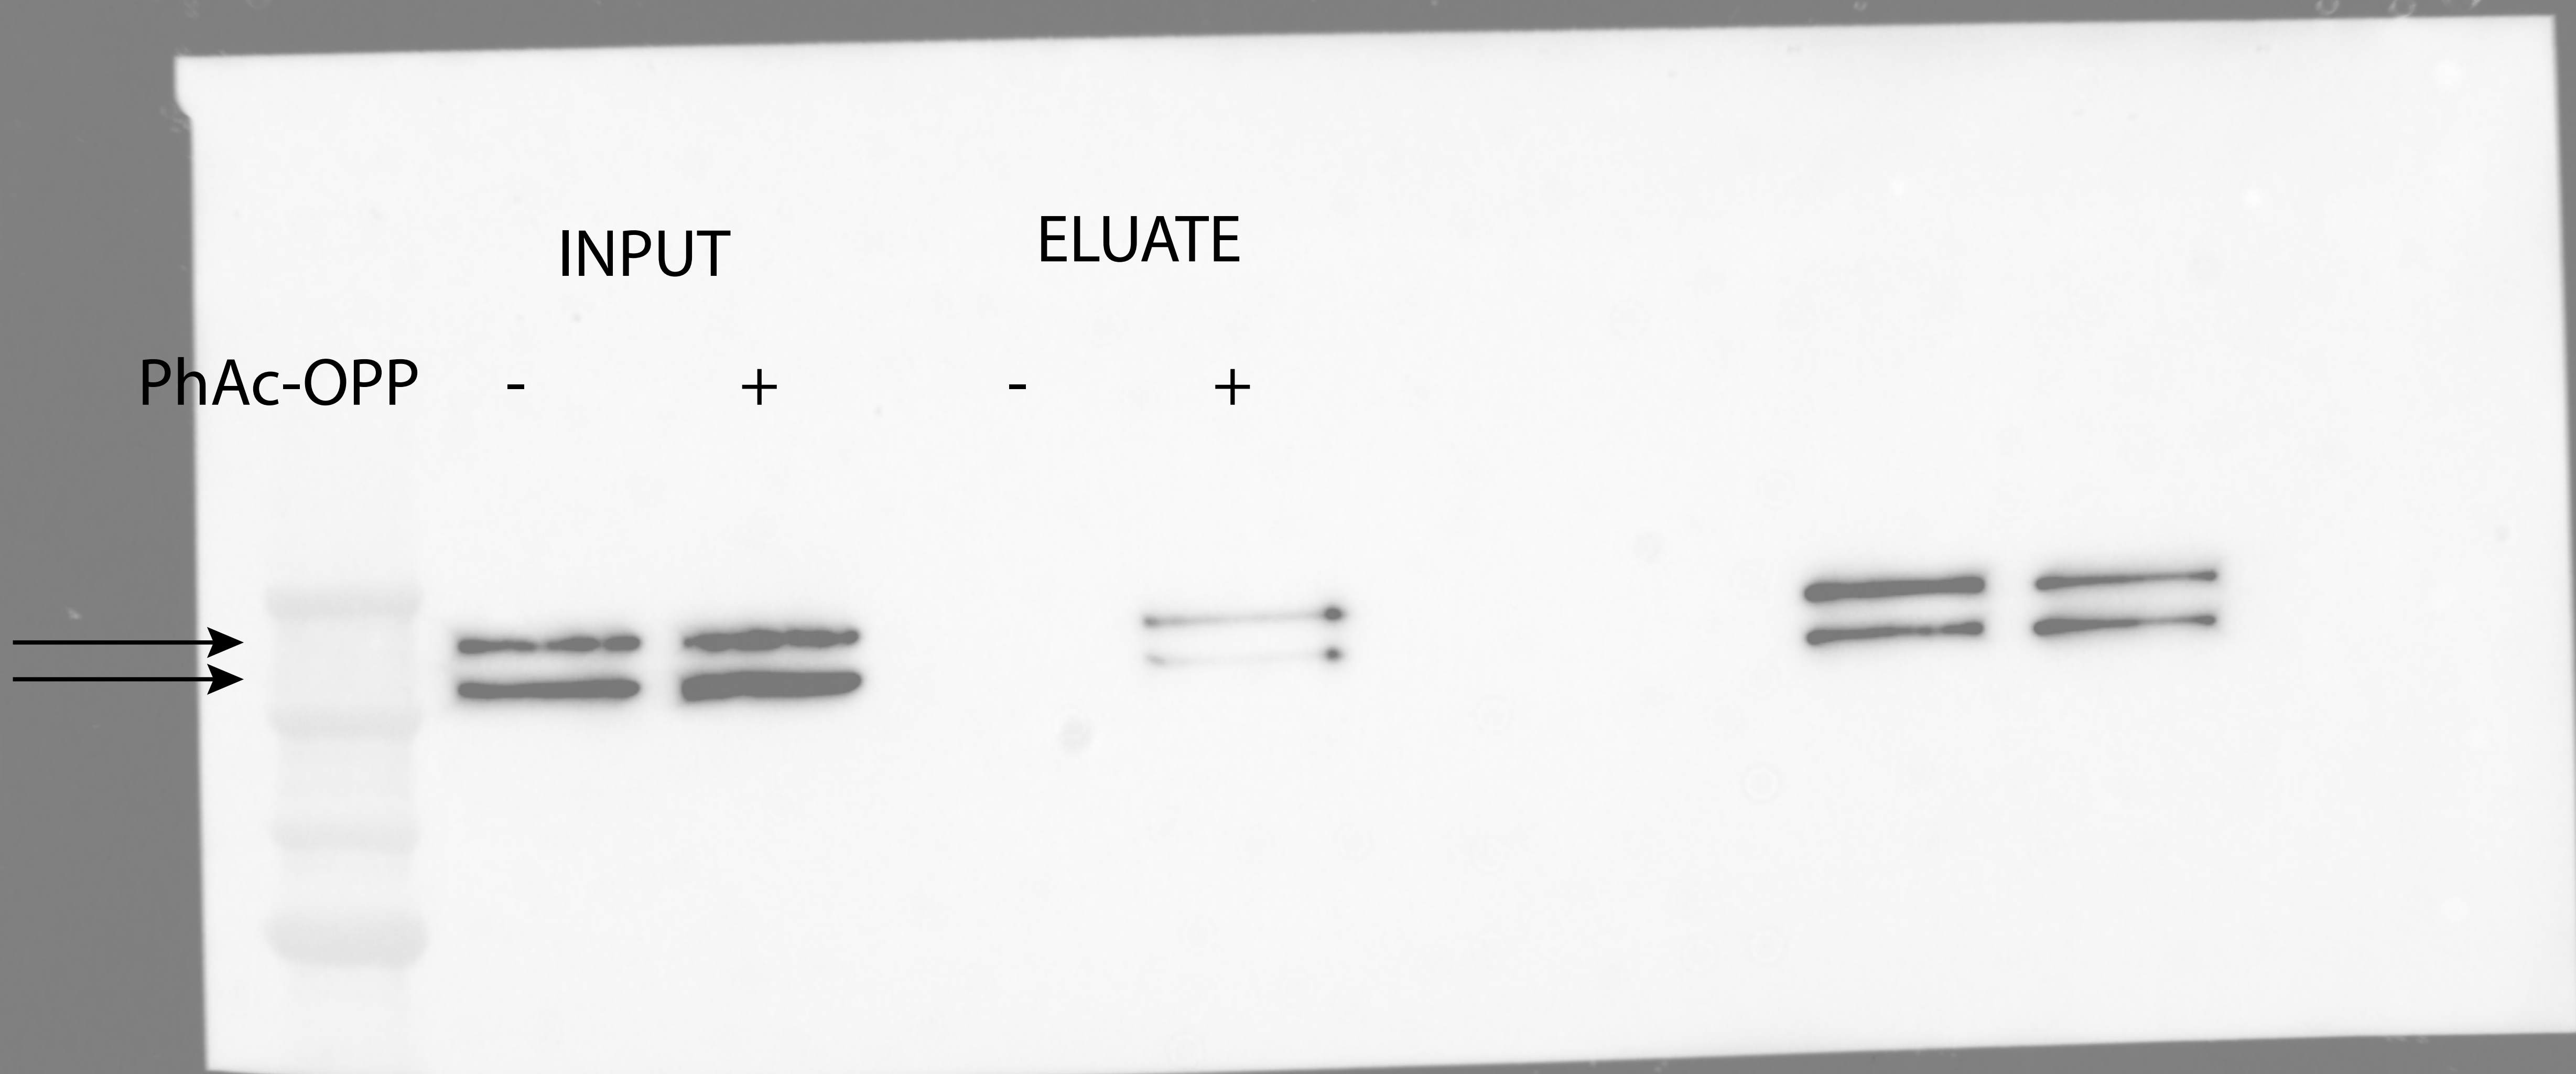

Supplement: fig4-data1 [file elife-83545-fig4-data1-v1.zip]

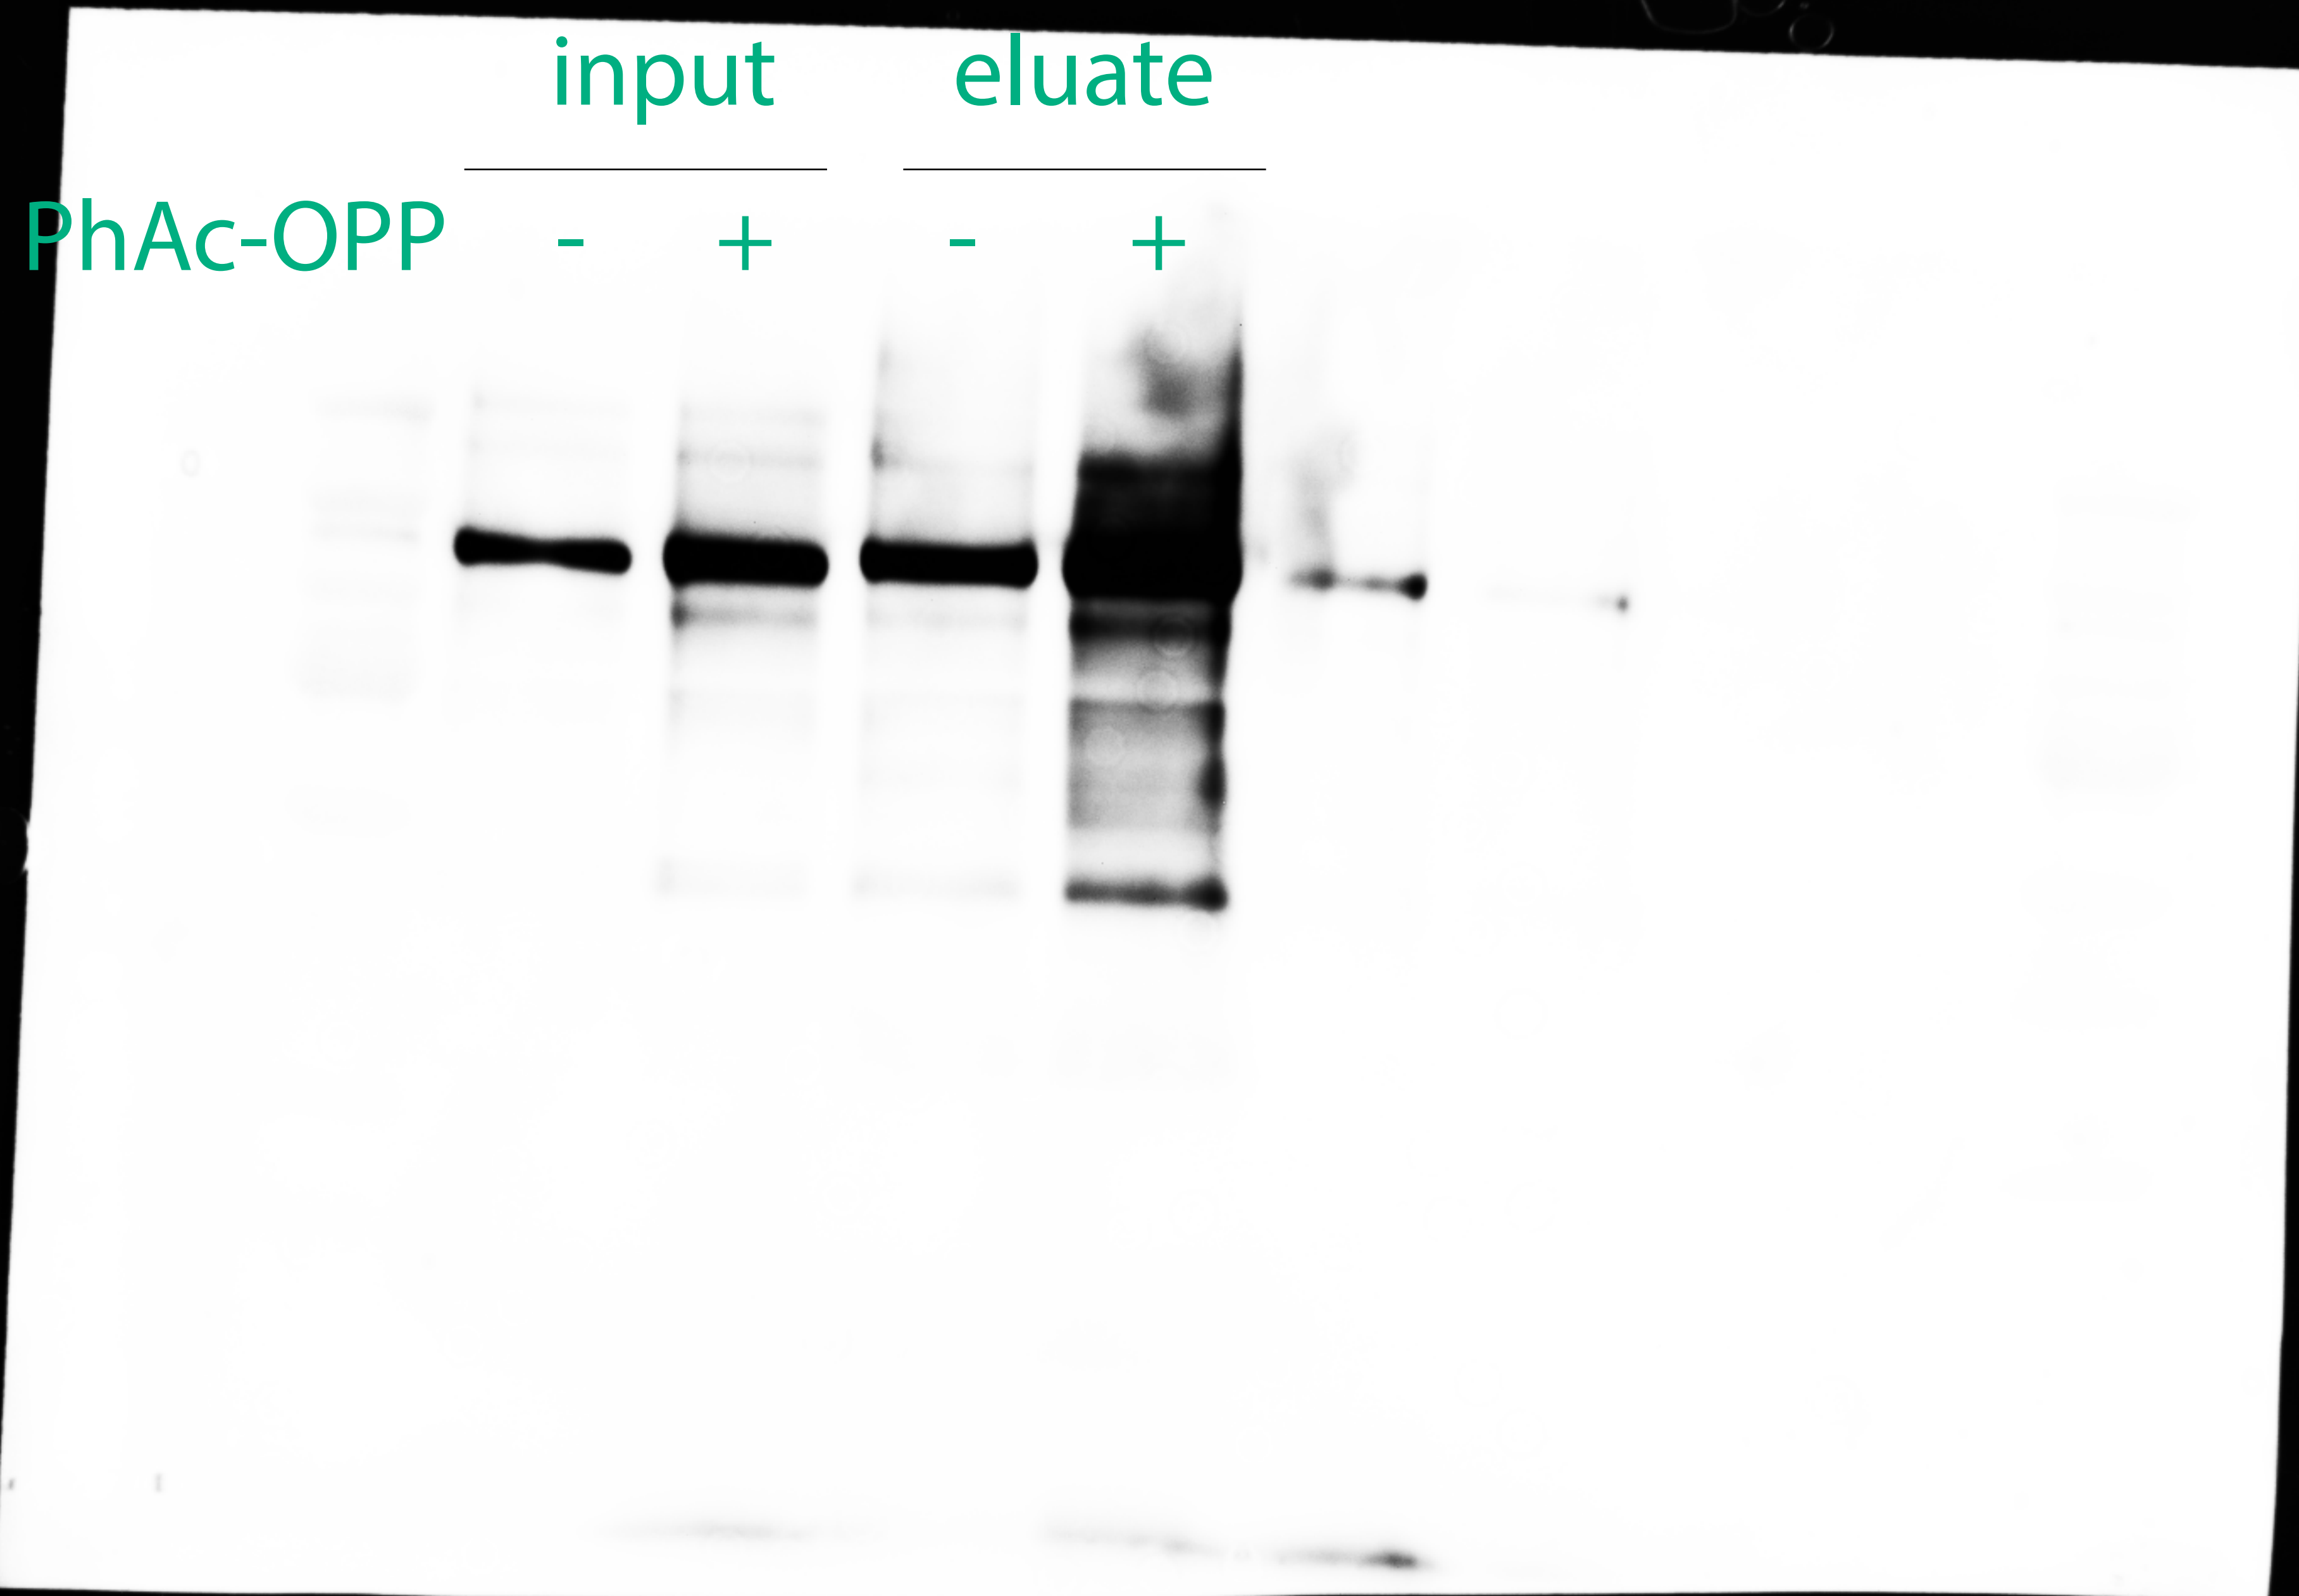

Supplement: fig4-data1 [file elife-83545-fig4-data1-v1.zip]

ELUATE

PhAc-OPP

-

+

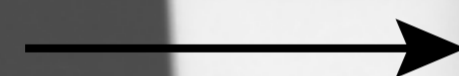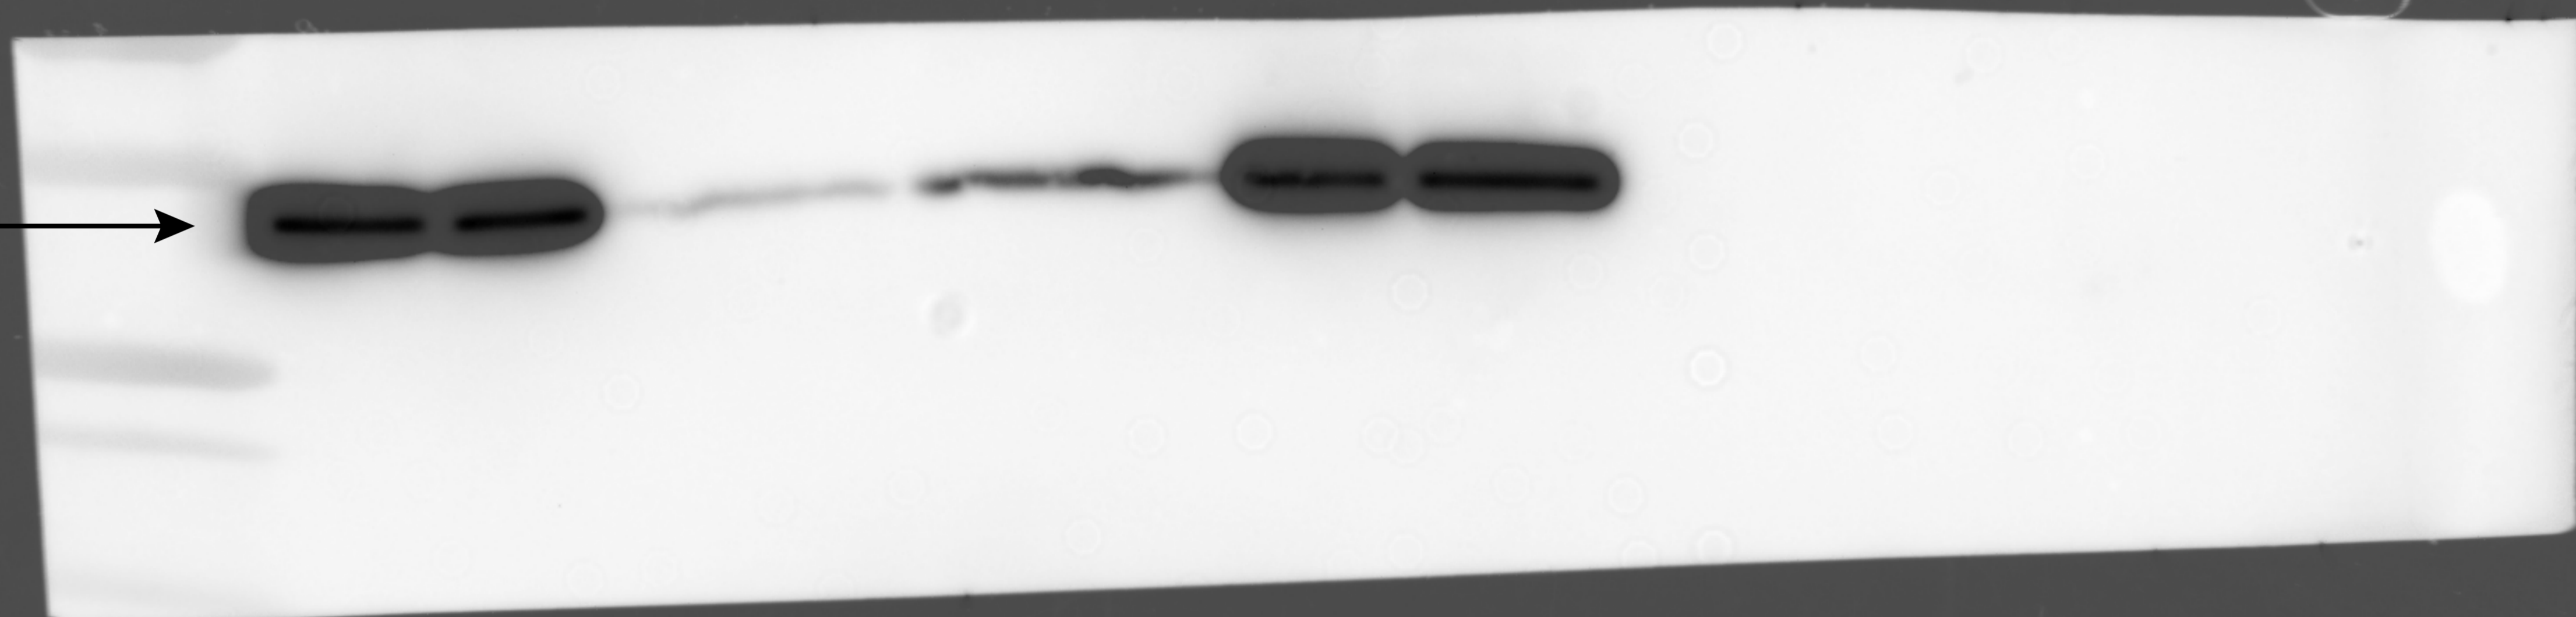

Supplement: fig4-data1 [file elife-83545-fig4-data1-v1.zip]

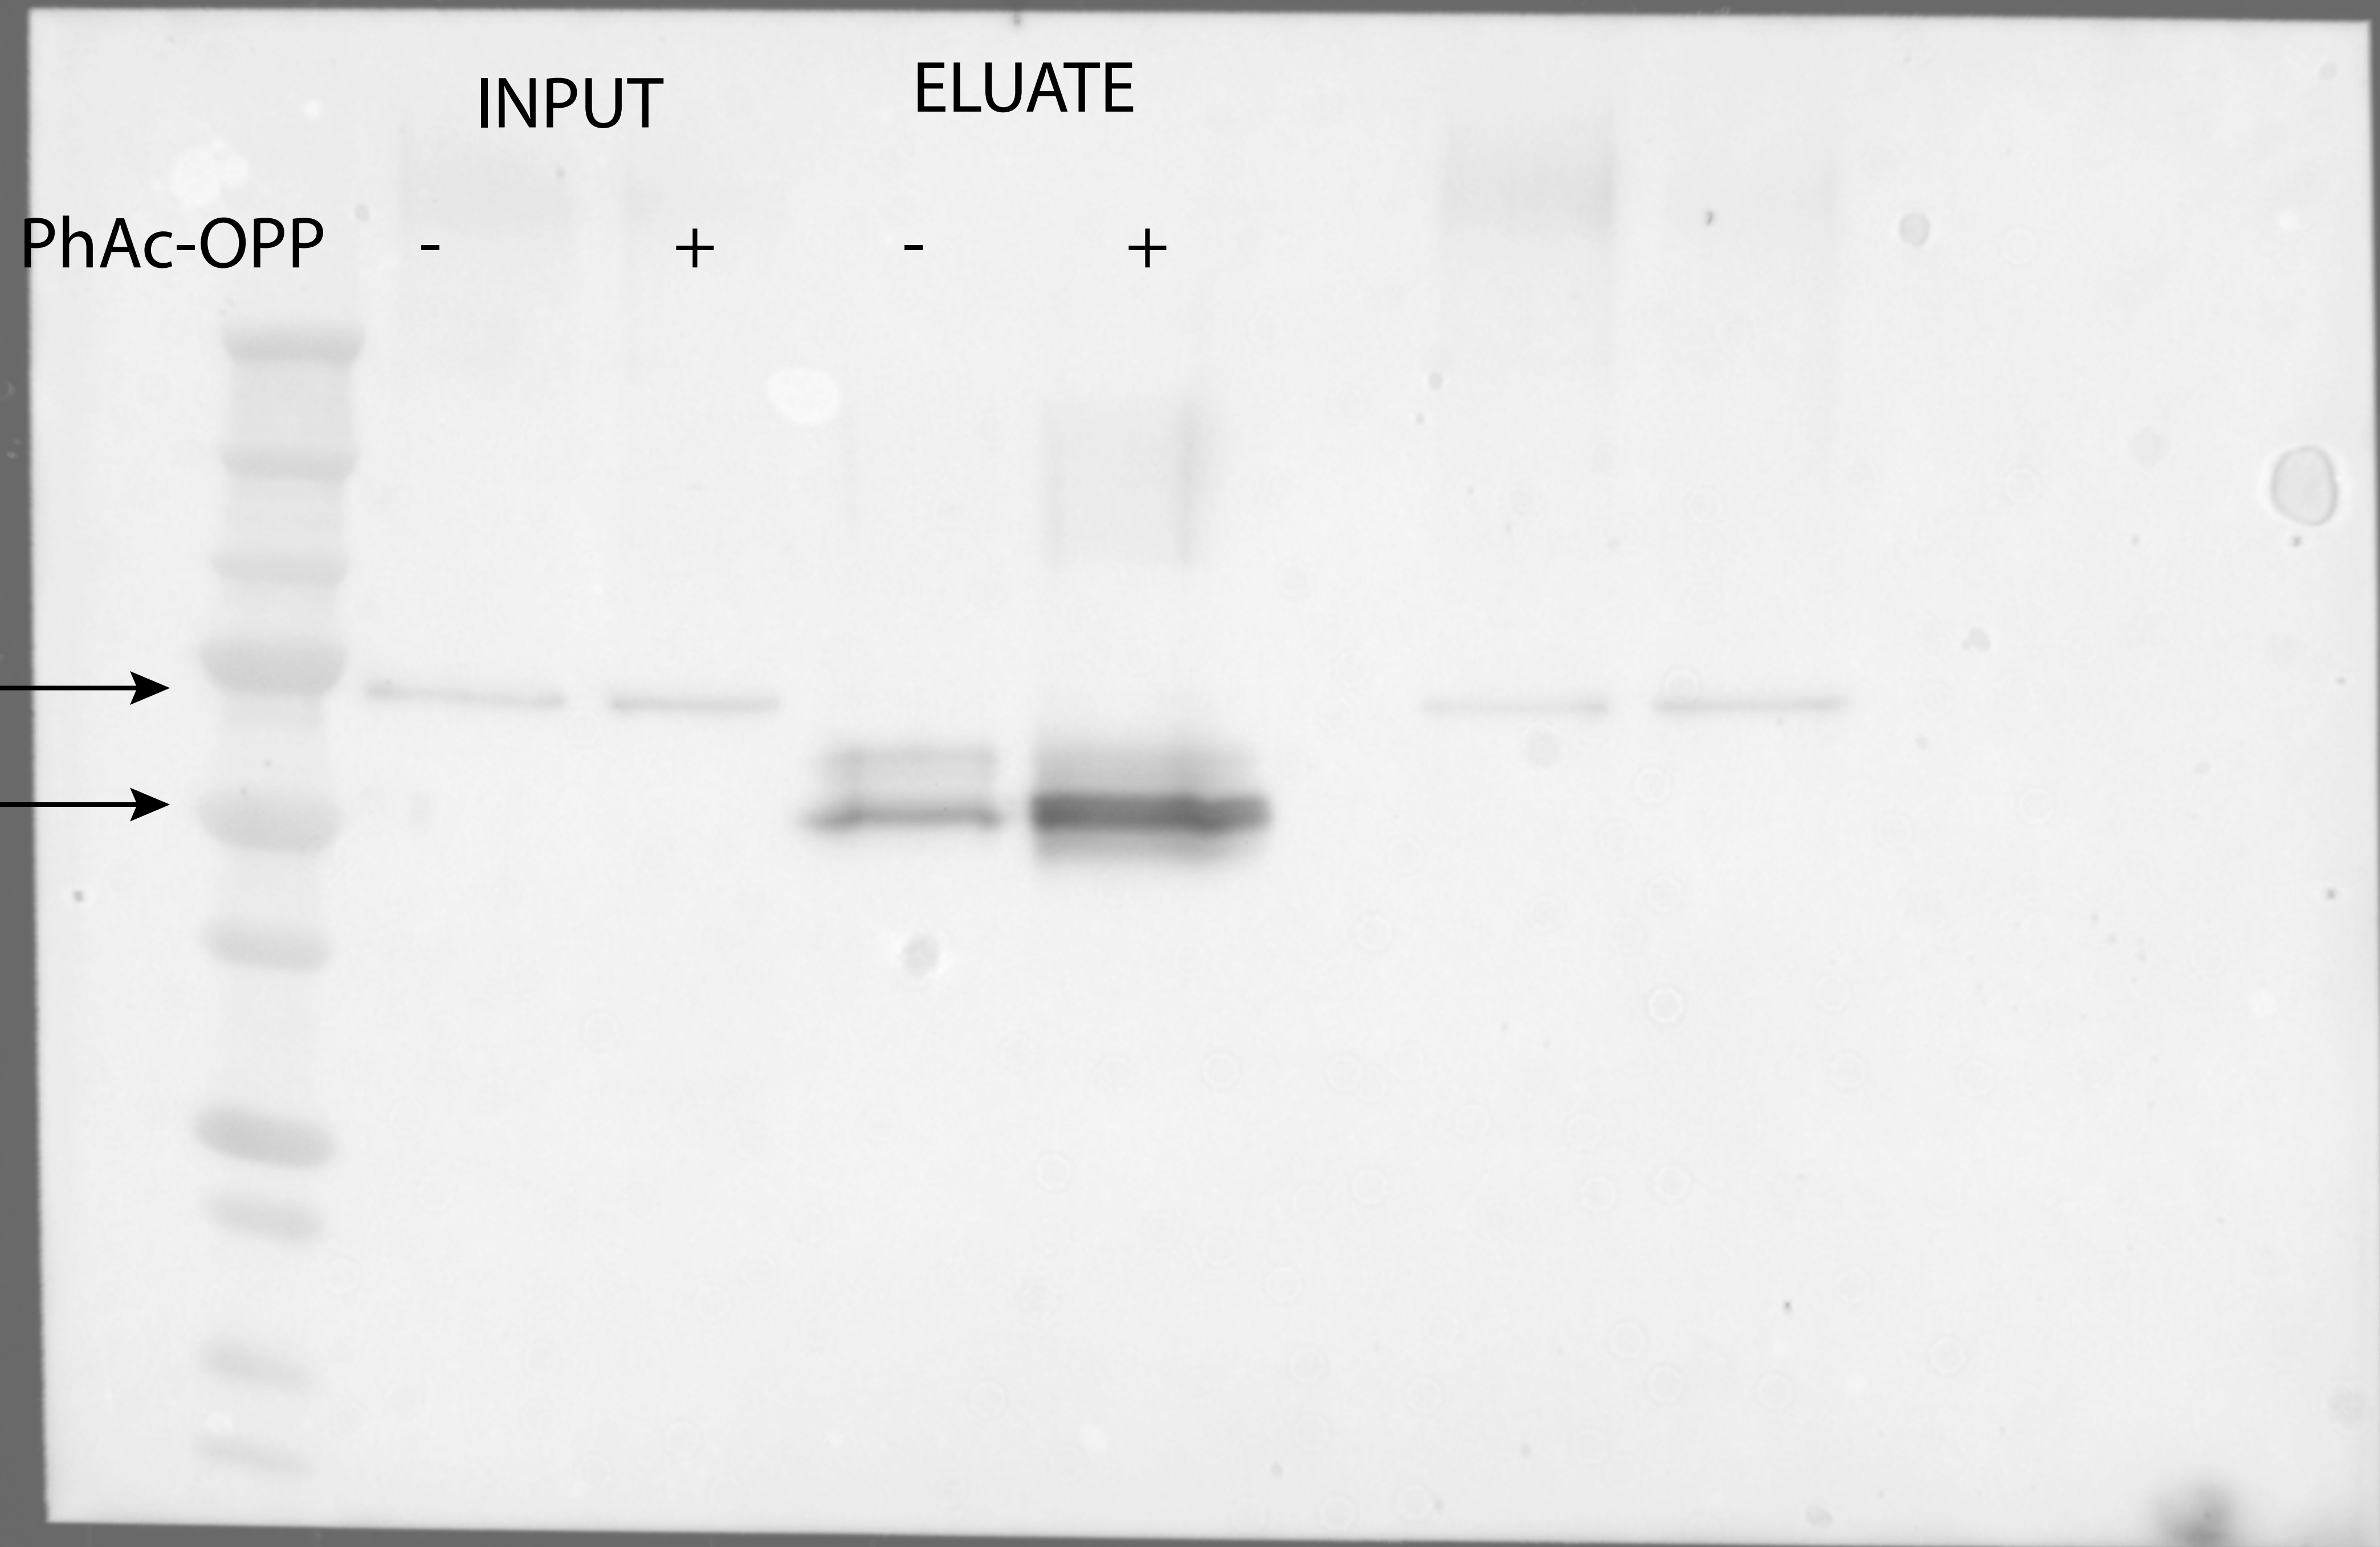

Supplement: fig4-data1 [file elife-83545-fig4-data1-v1.zip]

INPUT                      ELUATE

PhAc-OPP    -            +            -            +

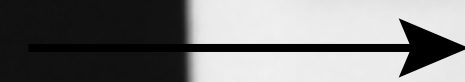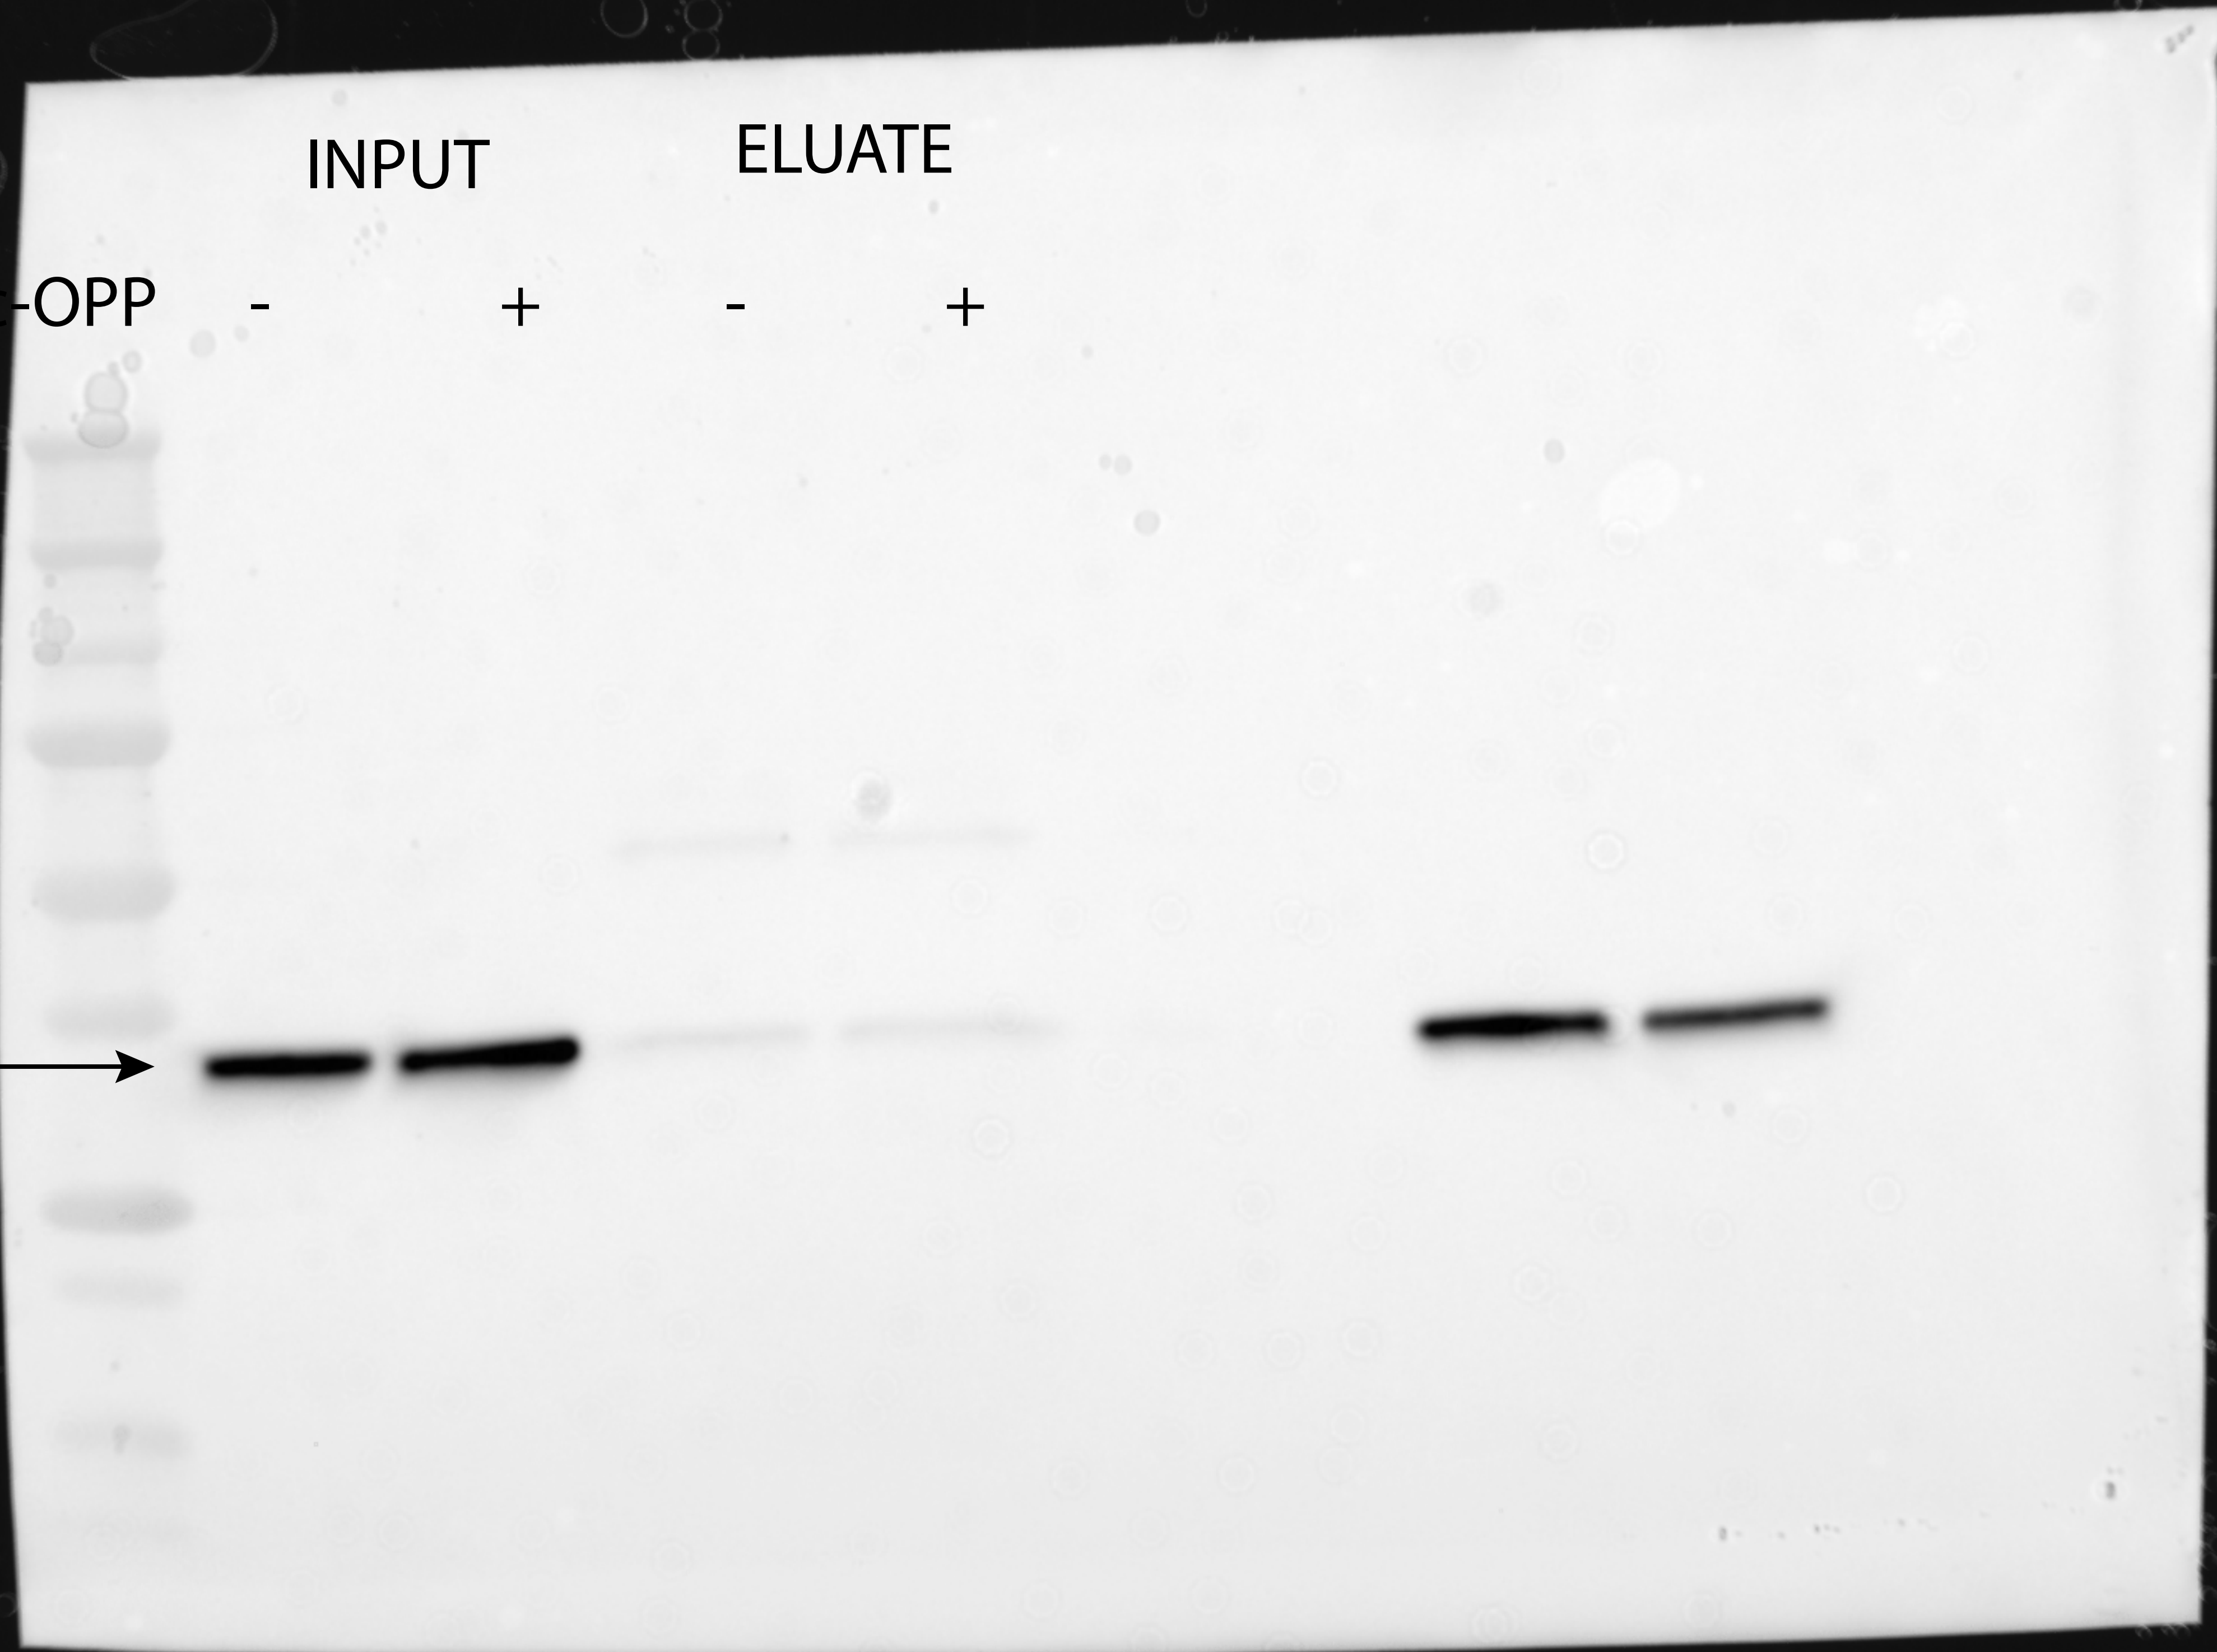

Supplement: fig4-data1 [file elife-83545-fig4-data1-v1.zip]

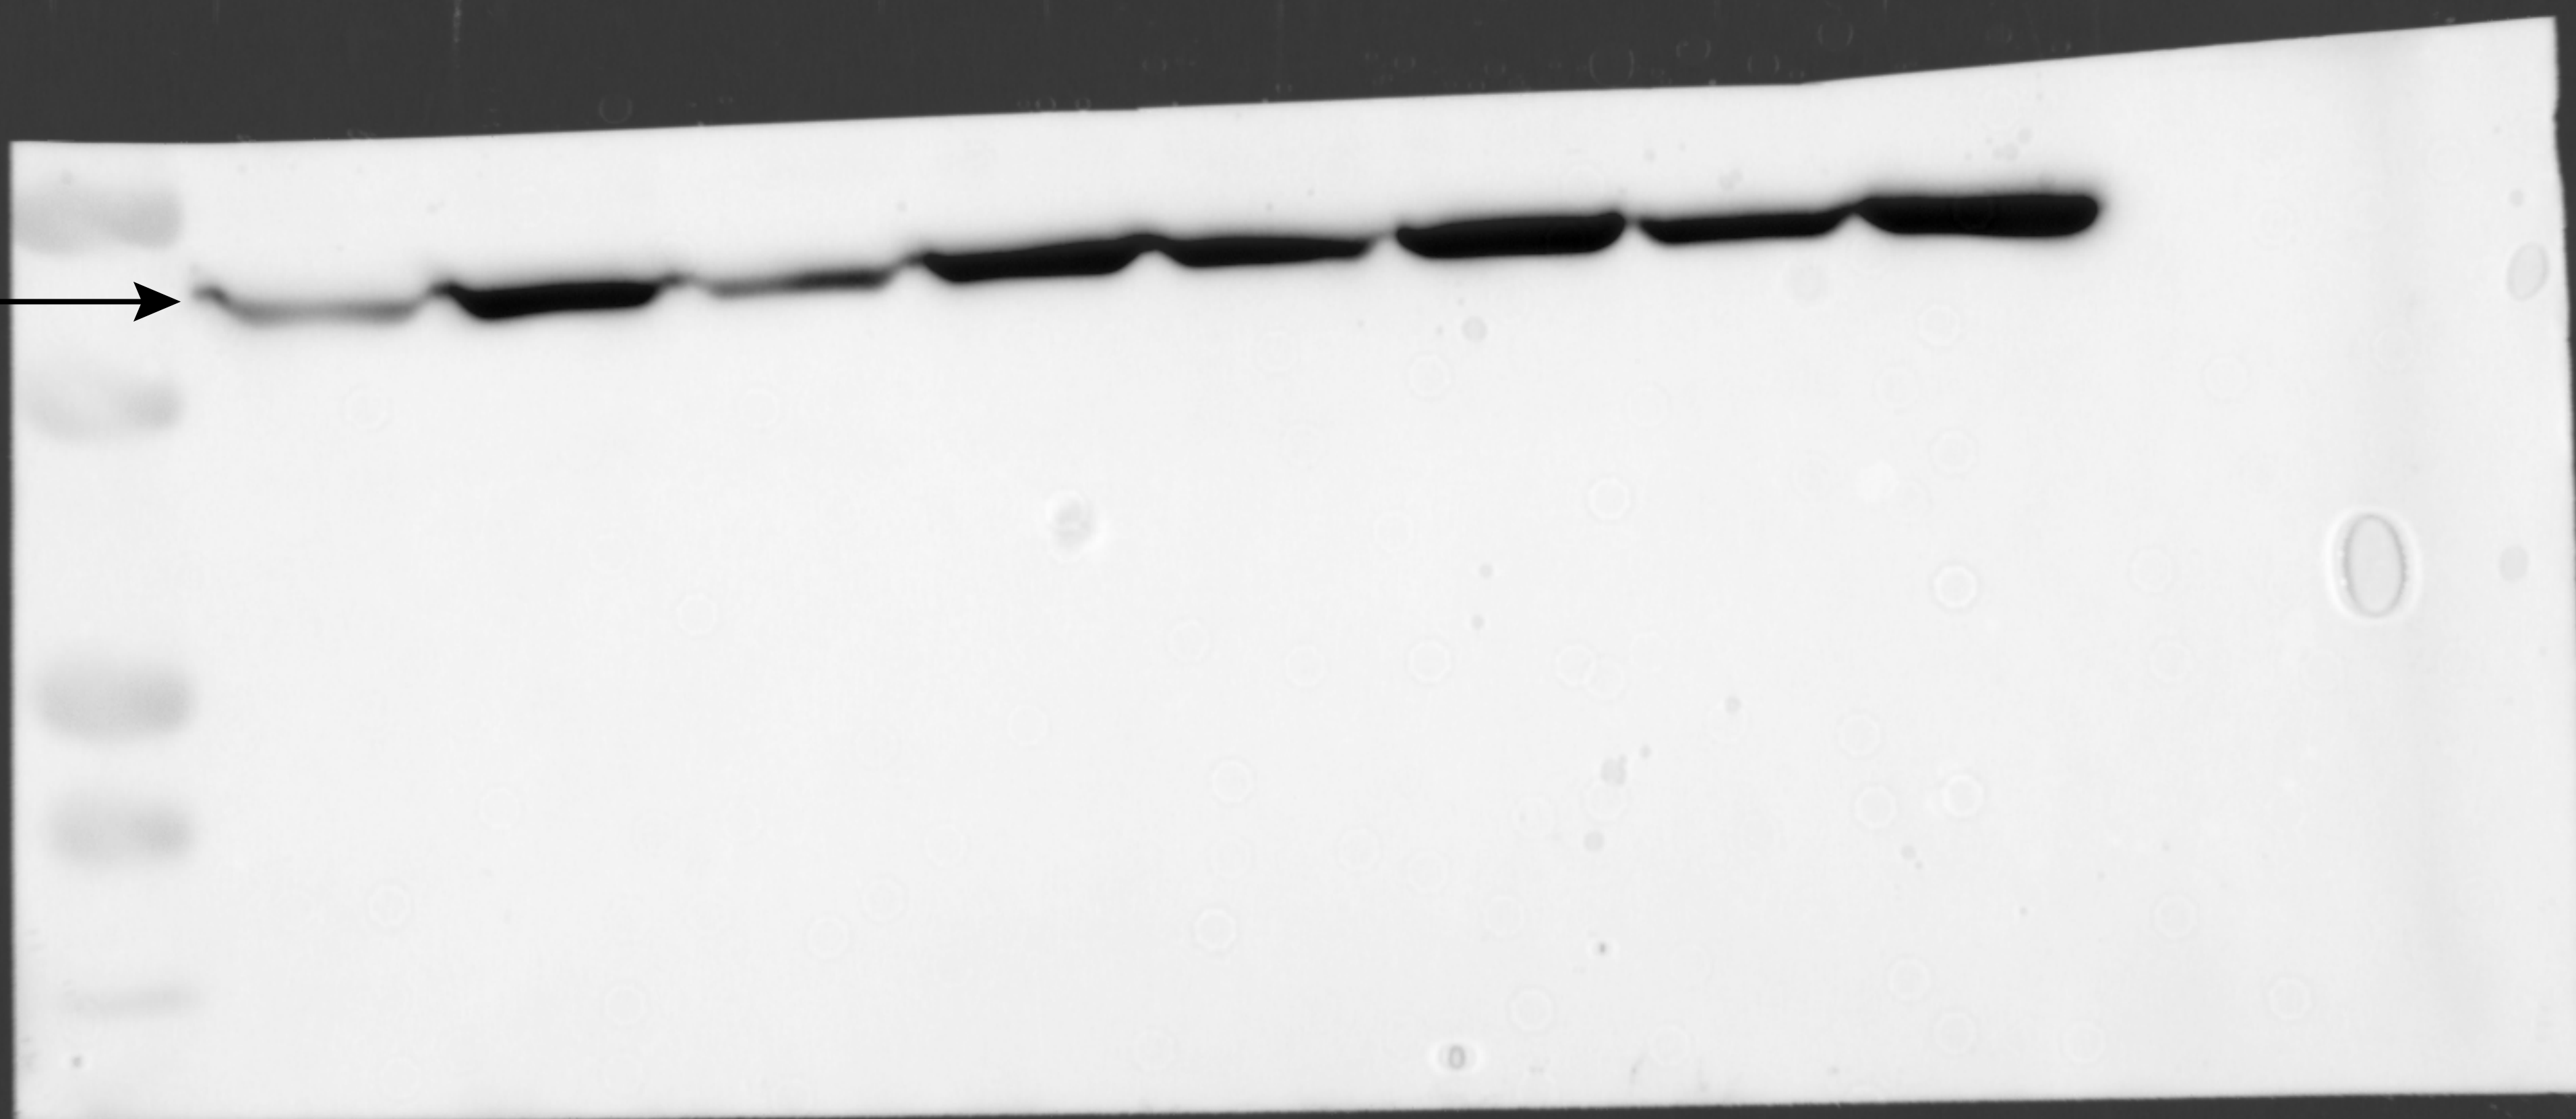

Supplement: fig6-data1 [file elife-83545-fig6-data1-v1.zip]

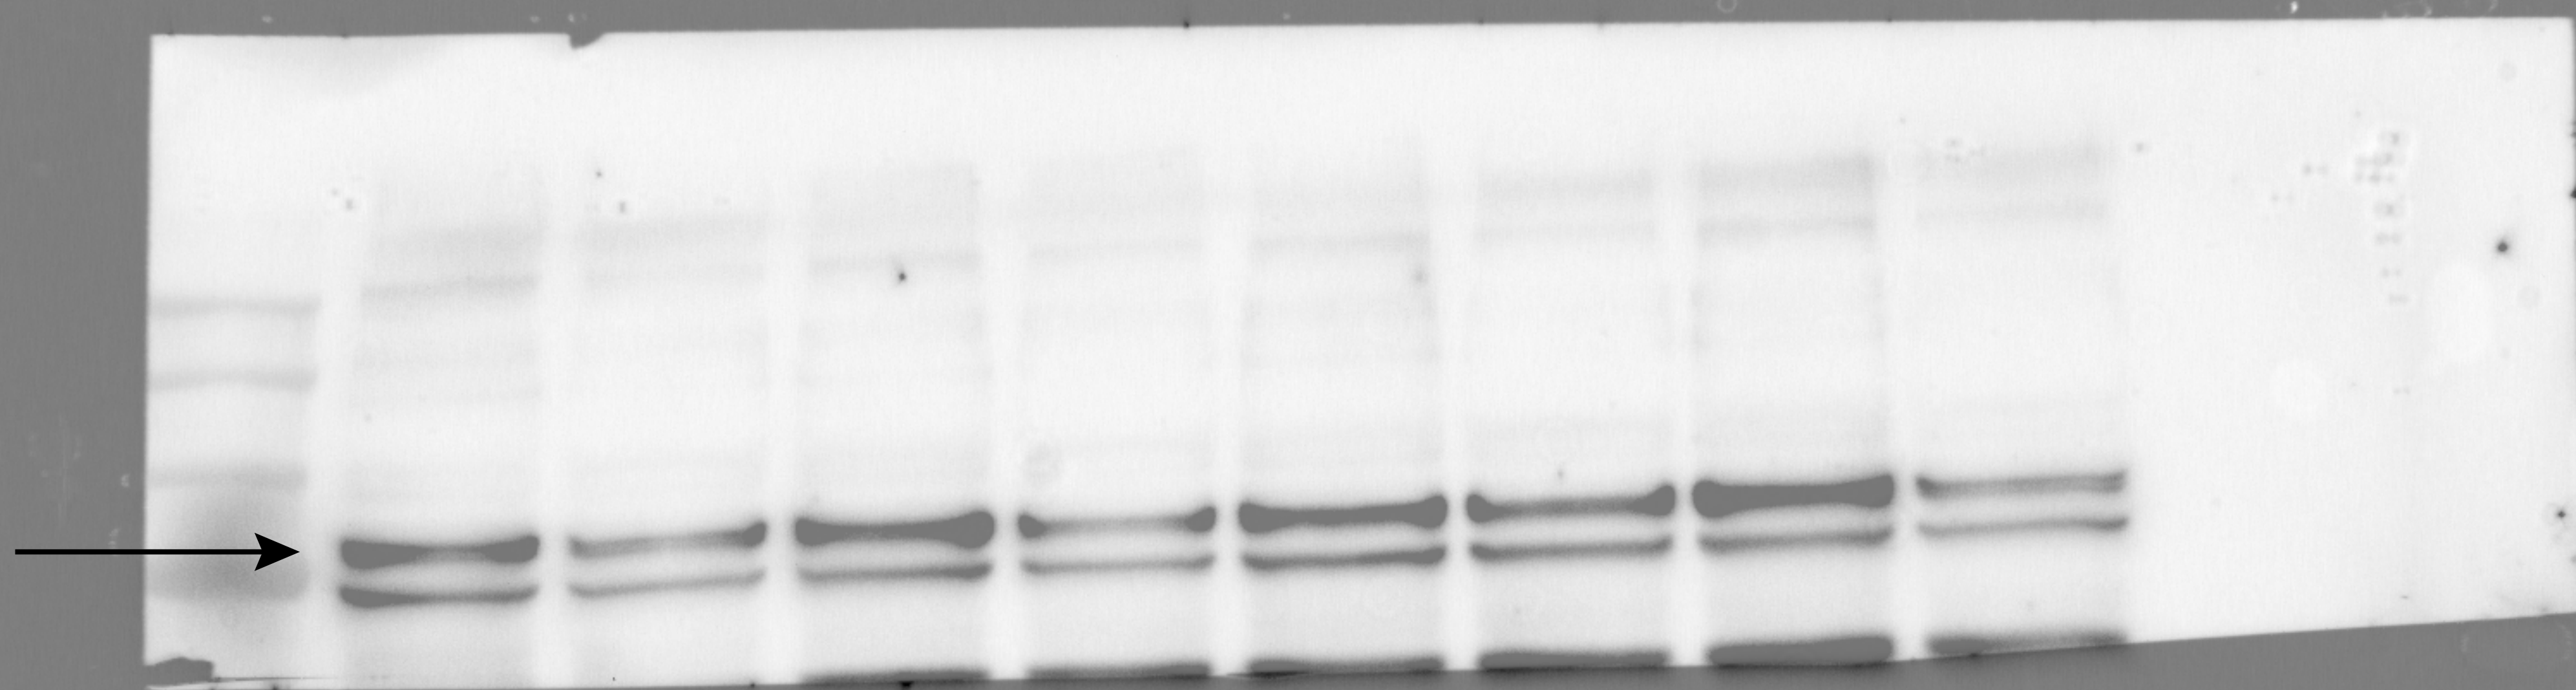

Supplement: fig6-data1 [file elife-83545-fig6-data1-v1.zip]
